# Supplementary material for: Exploring the Saccharomyces cerevisiae Volatile Metabolome: Indigenous versus Commercial Strains
Source: PubMed Central journal article supplement (PMC4657929; doi:10.1371/journal.pone.0143641), 2015-11-24
Supplement: pone.0143641.s003.pdf [file pone.0143641.s003.pdf]

1 **Supporting Information – S1 Protocol**

2

3

4 **Exploring the *Saccharomyces cerevisiae* volatile metabolome:**

5

**indigenous versus commercial strains**

6

7 Zélia Alves<sup>1</sup>, André Melo<sup>2,3</sup>, Ana Raquel Figueiredo<sup>1,2</sup>, Manuel A. Coimbra<sup>1</sup>, Ana C.

8

Gomes<sup>2</sup>, Sílvia M. Rocha<sup>1,\*</sup>

9 <sup>1</sup>Departament of Chemistry & QOPNA, University of Aveiro, 3810-193 Aveiro,

10 Portugal

11 <sup>2</sup>Genomics Unit, Biocant – Biotechnology Innovation Center, Parque Tecnológico de

12 Cantanhede, Núcleo 4, Lote 8, 3060-197 Cantanhede, Portugal

13 <sup>3</sup>Departament of Biology & CESAM, University of Aveiro, 3810-193 Aveiro, Portugal

# 14 **S1 Protocol - *S. cerevisiae* strain isolation, identification and** 15 **selection**

16

## 17 **Isolation of yeast strains from spontaneous fermentations**

18 The grapes were collected in different vineyards from the Bairrada Appellation  
19 in appropriate sterile bags and sent to the laboratory in cooled boxes. In the laboratory,  
20 grapes were crushed in a bag in aseptic conditions and the resulting must was  
21 transferred to a sterile 500 mL Erlenmeyer (Duran, Mainz, Germany). All fermentations  
22 were carried out at room temperature and monitored every day by measuring the weight  
23 loss. At the end of the fermentation (70 g/L weight loss), 100 mL were collected, and  
24 filtered into falcon tubes (VWR international, Radnor, PA, USA). The filtered must was  
25 diluted to  $10^{-4}$  times and plated in agar YPD medium (yeast extract 1% (w/v), glucose  
26 2% (w/v), peptone 2% (w/v), agar 2%, Formedium, Norfolk, UK) and placed in an  
27 incubator (Mettler, Schwabach, Germany) at 30°C during 48 hours. Thirty pure  
28 cultures from each fermentation were isolated and grown in the same conditions and  
29 preserved in YPD liquid medium with 40% w/v glycerol (Prolabo BDH, Fontenay-sous-  
30 Bois, France) at -80°C. We have collected 2160 isolates from 72 fermentations.

31

## 32 **Genomic DNA isolation**

33 DNA isolation was done on 1 mL pure cultures, cells were collected by  
34 centrifugation and washed twice with ultrapure water. Cells were then resuspended in  
35 100 µL of lysis buffer (1 M sorbitol, (BDH Laboratory Supplies, Poole, England) 0.1 M  
36 EDTA- $\text{Na}_2$  (BDH chemical, Poole, UK), 7.5 pH) and then 25 U of lyticase (Sigma-  
37 Aldrich, St. Louis, MO, USA) were added. The mixture was briefly vortexed and  
38 incubated at 37 °C during 1 hour. Then 100 µL of a second solution (50 mM Tris-HCl,  
39 20 mM EDTA- $\text{Na}_2$ , 7.4 pH) and 5 µL of 10% w/v SDS (Qbiogene) were added, the  
40 mixture was vortexed and incubated at 65 °C during 10 minutes. After that, 80 µL of 5  
41 M potassium acetate (Sigma-Aldrich, St. Louis, MO, USA) were added and the samples  
42 were incubated on ice during at least 10 minutes. The cellular debris and proteins  
43 present were pelleted by centrifugation and the supernatant, containing the DNA was  
44 collected into a new tube with 1 volume of isopropanol (Merck, Darmstadt, Germany).  
45 The solution was mixed and incubated for 10 minutes at -20°C allowing for DNA  
46 precipitation, which was then recovered by another centrifugation step. The supernatant

47 was discarded and the DNA pellet was washed with 70% ethanol (Scharlab, Barcelona,  
48 Spain) and dried for 3 minutes under vacuum. Finally, DNA was resuspended in 50 µL  
49 of TE (10mM Tris-HCl, 1 mM EDTA-Na<sub>2</sub>, 7.5 pH) and stored at -20 °C [1].

50

### 51 ***S. cerevisiae* identification**

52 To rapidly discriminate between *Saccharomyces* and non-*Saccharomyces* yeasts,  
53 MET2 gene amplifications were performed in an Eppendorf mastercycler pro  
54 (Eppendorf, Hamburg, Germany) using synthetic oligonucleotide primers for MET2.  
55 Amplifications were carried out in 25 µL reaction volumes containing 100 ng DNA, 1x  
56 reaction buffer (100mM Tris-HCl (pH 8.8 at 25 °C), 500 mM KCl, 0.8% igepal), 1.7  
57 mM MgCl<sub>2</sub>, 0.2 µM of each primer (MET2\_F: CGA AAA CGC TCC AAG AGC TGG  
58 and MET2\_R: GAC CAC GAT ATG CAC CAG GCA), 0.2 mM of each dNTP  
59 (Bioron, Ludwigshafen, Germany) and 0.5 U/µL taq DNA polymerase. After initial  
60 denaturation (94 °C for 3 minutes), the reaction mixture was cycled 35 times using the  
61 following settings: 94 °C for 1 minute, 60 °C for 1 minute, 72 °C for 1 minute and 30  
62 seconds, followed by a final extension at 72 °C during 5 minutes. Those yeasts that  
63 amplified MET2 were identified as *Saccharomyces*. *Saccharomyces cerevisiae* were  
64 identified by positive EcoRI digestion of the MET2 gene. The EcoRI digestion was  
65 done on reactions of 50 µL where 20 µL of the PCR product, 5 µL of 10x NEbuffer  
66 EcoRI (NEB, Ipswich, MA, USA) and 0.5 µL of the EcoRI enzyme (20 U/µL) (NEB,  
67 Ipswich, MA, USA) were used. MET2 gene amplification and resulting restriction  
68 fragments were analyzed on LabChip 90 (Caliper Life Sciences, Hopkinton, MA, USA)  
69 [2,3].

70 Those isolates that showed no amplification by PCR of MET2 were classified as  
71 non-*Saccharomyces* species, and were then identified by amplification of ITS region, in  
72 25 µL reaction volumes containing 100 ng DNA, 1x reaction buffer (100mM Tris-HCl  
73 (pH 8.8 at 25 °C), 500 mM KCl, 0.8% igepal), 2 mM MgCl<sub>2</sub>, 0.4 µM of each primer  
74 (ITS1: TCC GTA GGT GAA CCT GCG G and ITS4: TCC TCC GCT TAT TGA TAT  
75 GC), 0.2 mM of each dNTP (Bioron, Ludwigshafen, Germany) and 2.5 U/µL taq DNA  
76 polymerase. After initial denaturation (95 °C for 6 minutes), the reaction mixture was  
77 cycled 35 times using the following settings: 94 °C for 40 seconds, 53 °C for 40  
78 seconds, 72 °C for 1 minute, followed by a final extension at 72 °C during 5 minutes.  
79 The PCR product was analyzed on LabChip 90 (Caliper Life Sciences, Hopkinton, MA,

80 USA) and the size of the fragments compared with the values presented on S1 Table 1  
 81 [4,5].

82 **S1 Table 1. ITS fragment size and corresponding species (adapted from [4,5])**

| Species                             | Amplicon (bp) |
|-------------------------------------|---------------|
| <i>Schizosaccharomyces pombe</i>    | 970           |
| <i>Saccharomyces bayanus</i>        |               |
| <i>Saccharomyces cerevisiae</i>     | 880           |
| <i>Saccharomyces pastorianus</i>    |               |
| <i>Candida colliculosa</i>          | 810           |
| <i>Torulaspora delbrueckii</i>      | 803           |
| <i>Candida glabrata</i>             | 800           |
| <i>Hanseniaspora uvarum</i>         |               |
| <i>Kloeckera apiculata</i>          | 760           |
| <i>Saccharomyces ludwigii</i>       | 758           |
| <i>Zygosaccharomyces bailii</i>     | 750           |
| <i>Candida boidinii</i>             | 700           |
| <i>Kluyveromyces thermotolerans</i> | 682           |
| <i>Candida tenuis</i>               | 680           |
| <i>Candida famata</i>               |               |
| <i>Debaryomyces hansenii</i>        | 656           |
| <i>Candida zeylanoides</i>          | 620           |
| <i>Pichia guilliermondii</i>        | 606           |
| <i>Candida norvegica</i>            | 580           |
| <i>Candida albicans</i>             |               |
| <i>Candida tropicalis</i>           | 550           |
| <i>Candida parapsilosis</i>         | 520           |
| <i>Dekkera anomala</i>              | 514           |
| <i>Brettanomyces bruxellensis</i>   |               |
| <i>Candida stellata</i>             |               |
| <i>Dekkera intermedia</i>           | 500           |
| <i>Pichia membranaefaciens</i>      |               |
| <i>Issatchenkia orientalis</i>      | 494           |
| <i>Candida sake</i>                 |               |
| <i>Pichia fermentans</i>            | 470           |
| <i>Pichia kluyveri</i>              |               |
| <i>Dekkera bruxellensis</i>         | 459           |
| <i>Metschnikowia pulcherrima</i>    | 390           |

83

84 **Genomic fingerprinting by interdelta region amplification**

85 *Saccharomyces cerevisiae* were genotyped by electrophoretic profiling of  
 86 interdelta sequence. DNA amplification was performed recurring to primers d12 (5'-  
 87 TCA ACA ATG GAA TCC CAA C-3') and d2 (5'-GTG GAT TTT TAT TCC AAC-  
 88 3'). Thirty microliter of reaction mixture was prepared with 100 ng of DNA, Taq buffer

89 (67 mM Tris-HCl, 16 mM (NH<sub>4</sub>)<sub>2</sub>SO<sub>4</sub>, 0.01% Tween-20), 1.68 μM of each primer, 0.4  
90 mM of each dNTP, 3 mM MgCl<sub>2</sub> (Bioron, Ludwigshafen, Germany) and 1.0 U of  
91 TaqDNA polymerase (Bioron, Ludwigshafen, Germany). After initial denaturation (95  
92 °C for 2 minutes), the reaction mixture was cycled 35 times using the following  
93 settings: 95 °C for 30 seconds, 43.2 °C for 1 minute, 72 °C for 1 minute, followed by a  
94 final extension at 72 °C during 10 minutes. PCR products were analyzed using a high  
95 throughput automated microfluidic electrophoresis system (Caliper LabChip 90  
96 Electrophoresis System (Caliper Life Sciences, Hopkinton, MA, USA)) and a 96-well  
97 plate format, according to the manufacturer's instructions [3,6,7]. The resulting  
98 interdelta electrophoretic profiles were imported into BioNumerics 6.5 (Applied Maths,  
99 Sint-Martens-Latem, Belgium) and clustered according to their similarities.

100 Using this method we have grouped the 1789 *S. cerevisiae* in 313 strains that  
101 were phenotyped as explained in the S2 Protocol from Supporting information.

102

### 103 **References**

- 104 1. Querol A, Barrio E, Huerta T, Ramón D. Molecular Monitoring of Wine  
105 Fermentations Conducted by Active Dry Yeast Strains. *Appl Environ Microbiol.*  
106 1992;58: 2948–2953.
- 107 2. Masneuf I, Aigle M, Dubourdieu D. Development of a polymerase chain  
108 reaction/restriction fragment length polymorphism method for *Saccharomyces*  
109 *cerevisiae* and *Saccharomyces bayanus* identification in enology. *FEMS*  
110 *Microbiol Lett.* 1996;138: 239–244.
- 111 3. Ribéreau-Gayon P, Dubourdieu D, Donèche B, Lonvaud A. *Handbook of*  
112 *Enology: The Microbiology of Wine and Vinifications.* Chichester, UK: John  
113 Wiley & Sons, Ltd; 2005.
- 114 4. Granchi L, Bosco M, Messini A, Vincenzini M. Rapid detection and  
115 quantification of yeast species during spontaneous wine fermentation by PCR–  
116 RFLP analysis of the rDNA ITS region. *J Appl Microbiol.* Blackwell Science  
117 Ltd; 1999;87: 949–956.
- 118 5. Guillamón JM, Sabaté J, Barrio E, Cano J, Querol A. Rapid identification of  
119 wine yeast species based on RFLP analysis of the ribosomal internal transcribed  
120 spacer (ITS) region. *Arch Microbiol.* 1998;169: 387–92.
- 121 6. Carreto L, Eiriz M, Gomes A, Pereira P, Schuller D, Santos M. Comparative  
122 genomics of wild type yeast strains unveils important genome diversity. *BMC*  
123 *Genomics.* 2008;9: 524.

124 7. Franco-Duarte R, Mendes I, Gomes AC, Santos MAS, de Sousa B, Schuller D.  
125 Genotyping of *Saccharomyces cerevisiae* strains by interdelta sequence typing  
126 using automated microfluidics. *Electrophoresis*. 2011;32: 1447–1455.

127

128

129

130

131

132

133

134

135

136

137

138

139

140

141

142

143

144

145

146

147

148

149
