# Supplementary material for: Exploring the Saccharomyces cerevisiae Volatile Metabolome: Indigenous versus Commercial Strains
Source: PubMed Central journal article supplement (PMC4657929; doi:10.1371/journal.pone.0143641), 2015-11-24
Supplement: pone.0143641.s004.pdf [file pone.0143641.s004.pdf]

1 **Supporting Information – S2 Protocol**

2

3

4 **Exploring the *Saccharomyces cerevisiae* volatile metabolome:**

5

**indigenous versus commercial strains**

6

7 Zélia Alves<sup>1</sup>, André Melo<sup>2,3</sup>, Ana Raquel Figueiredo<sup>1,2</sup>, Manuel A. Coimbra<sup>1</sup>, Ana C.

8

Gomes<sup>2</sup>, Sílvia M. Rocha<sup>1,\*</sup>

9 <sup>1</sup>Departament of Chemistry & QOPNA, University of Aveiro, 3810-193 Aveiro,

10 Portugal

11 <sup>2</sup>Genomics Unit, Biocant – Biotechnology Innovation Center, Parque Tecnológico de

12 Cantanhede, Núcleo 4, Lote 8, 3060-197 Cantanhede, Portugal

13 <sup>3</sup>Departament of Biology & CESAM, University of Aveiro, 3810-193 Aveiro, Portugal

## 14 **S2 Protocol – Phenotypic *S. cerevisiae* characterization**

15

### 16 **High throughput phenomics of the 313 *S. cerevisiae* strains**

17

18 The strains were grown in YPD agar medium (yeast extract 1% (w/v), glucose  
19 2% (w/v), peptone 2% (w/v), agar 2%, Formedium, Norfolk, UK) for 2 days at 30°C.  
20 The obtained biomass for each strain was then used to inoculate 96-wells deep wells  
21 plate (NUNC, Rochester, New York, USA) containing 1.75 mL of YPD medium (1%  
22 (w/v) yeast extract, 2% (w/v) glucose, 2% (w/v) peptone, Formedium, Norfolk, UK).  
23 These plates were sealed with a pre-sterilized breathable sealing film (Axygen  
24 Scientific) and incubated at 30°C overnight, with gentle agitation (100 rpm).  
25 Afterwards, the cells were counted with a TC10 Automated Cell Counter (BioRad,  
26 Hercules, CA, USA) and  $10^6$  cells were transferred to 1 mL of YPD in a 96 well plate  
27 (NUNC, Rochester, New York, USA). Three serial dilutions ( $10^5$ ,  $10^4$  and  $10^3$  cells)  
28 were also prepared. It was used a liquid handling station (Sciclone ALH 3000  
29 Workstation – Caliper LifeSciences, Hopkinton, Massachusetts, USA) with a sterile 96-  
30 pin tool (VP Scientific, San Diego, CA, USA) to inoculate single well plates (NUNC,  
31 Rochester, New York, USA) containing the media of interest. All plates were then  
32 incubated at 30°C for 2 days unless noted otherwise. After incubation the strains were  
33 scored according to their ability to grow from 0 (no growth in any concentration) to 8  
34 (maximum growth observed in the most diluted concentration) and were clustered using  
35 the Pearson correlation and UPGMA clustering (MultiExperiment Viewer 4.7.4).

36

### 37 *Carbon source media*

38 Different carbon sources were tested using 0,69% (w/v) YNB without amino  
39 acids (Formedium, Norfolk, UK) and 2% (w/v) agar supplemented with different carbon  
40 sources - 2% (w/v) fructose, 20% (w/v) fructose, 2% (w/v) maltose, 2% (w/v) sucrose,  
41 2% (w/v) galactose, 2% (w/v) raffinose, 2% (w/v) glucose, 20% (w/v) glucose or 10%  
42 (w/v) glucose + 10% (w/v) fructose (Formedium, Norfolk, UK). The use of glycerol as  
43 carbon source was also teste in YPG (1% (w/v) yeast extract (Formedium, Norfolk,  
44 UK), 2% (w/v) peptone (Formedium, Norfolk, UK), 2% (w/v) agar (Formedium,  
45 Norfolk, UK) and 3% (V/V) glycerol);

46

47 *Nitrogen source media*

48 Three different nitrogen sources were tested using (i) 0,69% (w/v) YNB without  
49 amino acids, 2% (w/v) glucose and 2% (w/v) agar; (ii) 0,19% (w/v) YNB without  
50 amino acids and ammonium sulphate, 2% (w/v) glucose and 2% (w/v) agar; and (iii)  
51 0,19% (w/v) YNB without amino acids and ammonium sulphate, 2% (w/v) glucose and  
52 2% (w/v) agar, supplemented with 1 amino acid (31% (w/v) proline, 50% (w/v) proline,  
53 27% (w/v) arginine, 50% (w/v) arginine, 13% (w/v) glutamate or 50% (w/v) glutamate)  
54 (Formedium, Norfolk, UK);

55

56 *Drugs and ion tolerance testing media*

57 It was tested growth in YPD agar media supplemented with either NaCl 1M;  
58 CaCl<sub>2</sub> 0,5 M; ZnCl<sub>2</sub> 10 mM; LiCl 50 mM; CuSO<sub>4</sub> 10 mM; CdCl<sub>2</sub> 500 µM; 0,5 µg/ml of  
59 4-nitroquinoline 1-oxide; 15 mM of caffeine; 0,2 µg/ml of cycloheximide; or 2 mg/ml  
60 of paromomycin by sterile filtering stock solutions.

61

62 *Temperature resistance*

63 The tolerance to different growth temperatures was evaluated with YPD agar  
64 medium (yeast extract 1% (w/v), glucose 2% (w/v), peptone 2% (w/v), agar 2%,  
65 Formedium, Norfolk, UK) incubated at 12°C (for 7 days), 30°C or 42°C.

66

67 *Oxidative stress*

68 Oxidative stress tolerance was evaluated with YPD agar (yeast extract 1% (w/v),  
69 glucose 2% (w/v), peptone 2% (w/v), agar 2%, Formedium, Norfolk, UK)  
70 supplemented with 7 mM of H<sub>2</sub>O<sub>2</sub> by sterile filtering a stock solution.

71

72 *Hydrogen sulphide (H<sub>2</sub>S) production*

73 The capacity to produce H<sub>2</sub>S was evaluated by plating 10<sup>6</sup> cells to a  
74 commercially available BiGGY agar medium (73608 BiGGY Agar, Fluka, St. Louis,  
75 Missouri, United States) prepared according to manufacturer's instructions. After 2 days  
76 at 25°C, H<sub>2</sub>S formation was evaluated based on the varying colony colour, which turn  
77 light brown to black if H<sub>2</sub>S is formed or remain white if there is no production of H<sub>2</sub>S.  
78 The yeast scores were based on presence or absence of H<sub>2</sub>S (white colonies scored 0  
79 and non-white colonies scored 1).

80

81 *Ethanol tolerance*

82 Ethanol tolerance was evaluated with YPD agar (yeast extract 1% (w/v), glucose  
83 2% (w/v), peptone 2% (w/v), agar 2%, Formedium, Norfolk, UK) plates supplemented  
84 with 12% and 15% (v/v) of ethanol.

85

86 *Sulfur dioxide (SO<sub>2</sub>) tolerance*

87 Sulfur dioxide tolerance was evaluated with YPD agar (yeast extract 1% (w/v),  
88 glucose 2% (w/v), peptone 2% (w/v), agar 2%, Formedium, Norfolk, UK)  
89 supplemented with 200 mg/L of H<sub>2</sub>SO<sub>3</sub>.

90

91
