# Supplementary material for: Exploring the Saccharomyces cerevisiae Volatile Metabolome: Indigenous versus Commercial Strains
Source: PubMed Central journal article supplement (PMC4657929; doi:10.1371/journal.pone.0143641), 2015-11-24
Supplement: pone.0143641.s005.pdf [file pone.0143641.s005.pdf]

## Supporting Information – S1 Table

### Exploring the *Saccharomyces cerevisiae* metabolomics biodiversity: indigenous versus commercial strains

Zélia Alves<sup>1</sup>, André Melo<sup>2,3</sup>, Ana Raquel Figueiredo<sup>1,2</sup>, Manuel A. Coimbra<sup>1</sup>, Ana C. Gomes<sup>2</sup>, Sílvia M. Rocha<sup>1,\*</sup>

<sup>1</sup>Department of Chemistry & QOPNA, University of Aveiro, 3810-193 Aveiro, Portugal

<sup>2</sup>Genomics Unit, Biocant – Biotechnology Innovation Center, Parque Tecnológico de Cantanhede, Núcleo 4, Lote 8, 3060-197 Cantanhede, Portugal

<sup>3</sup>Department of Biology & CESAM, University of Aveiro, 3810-193 Aveiro, Portugal

**S1 Table.** Volatile metabolites identified by HS-SPME/GC×GC-ToFMS in four *S. cerevisiae* strains under study: BT2453 and BT2652 corresponding to strains isolated from wine, and CSc1 and CSc2, corresponding to commercial yeast strains.

| N <sup>o</sup>                 | 1 <sup>o</sup> t <sub>R</sub> <sup>a</sup> (s) | 2 <sup>o</sup> t <sub>R</sub> <sup>a</sup> (s) | Compound                      | Formula                                        | CAS        | RI <sub>Calc</sub> <sup>c</sup> | RI <sub>Lit</sub> <sup>d</sup> | BT2453        | BT2652        | CSc1          | CSc2          | Ref  | Peak Area <sup>b</sup> (x10 <sup>6</sup> ) and RSD (%) |  |  |  |
|--------------------------------|------------------------------------------------|------------------------------------------------|-------------------------------|------------------------------------------------|------------|---------------------------------|--------------------------------|---------------|---------------|---------------|---------------|------|--------------------------------------------------------|--|--|--|
|                                |                                                |                                                |                               |                                                |            |                                 |                                |               |               |               |               |      |                                                        |  |  |  |
| <b>Acetals</b>                 |                                                |                                                |                               |                                                |            |                                 |                                |               |               |               |               |      |                                                        |  |  |  |
| 1                              | 145                                            | 0.432                                          | 1,1-Diethoxyethane            | C <sub>6</sub> H <sub>14</sub> O <sub>2</sub>  | 105-57-7   | 711                             | 690                            | 1.33 (20)     | 1.64 (11)     | 1.00 (17)     | 1.30 (35)     | [1]  |                                                        |  |  |  |
| 2                              | 145                                            | 0.456                                          | 2,4,5-Trimethyl-1,3-dioxolane | C <sub>6</sub> H <sub>12</sub> O <sub>2</sub>  | 3299-32-9  | 711                             | 690                            | 2.26 (35)     | 3.04 (9)      | 1.31 (3)      | 1.66 (25)     | [1]  |                                                        |  |  |  |
| 3                              | 290                                            | 0.728                                          | 2,2,3-Trimethyloxetane        | C <sub>6</sub> H <sub>12</sub> O               | 23120-43-6 | 917                             | -                              | 0.22 (18)     | -             | -             | -             |      |                                                        |  |  |  |
| <b>Subtotal (GC Peak Area)</b> |                                                |                                                |                               |                                                |            |                                 |                                | <b>3.81</b>   | <b>4.68</b>   | <b>2.31</b>   | <b>2.96</b>   |      |                                                        |  |  |  |
| <b>Subtotal (%)</b>            |                                                |                                                |                               |                                                |            |                                 |                                | <b>0.36</b>   | <b>0.64</b>   | <b>0.33</b>   | <b>0.39</b>   |      |                                                        |  |  |  |
| <b>Acids</b>                   |                                                |                                                |                               |                                                |            |                                 |                                |               |               |               |               |      |                                                        |  |  |  |
| 4                              | 100                                            | 3.336                                          | Acetic acid                   | C <sub>2</sub> H <sub>4</sub> O <sub>2</sub>   | 64-19-7    | 636                             | 600                            | 63.93 (32)    | 63.10 (22)    | 40.84 (8)     | 1.50 (6)      | [2]  |                                                        |  |  |  |
| 5                              | 135                                            | 4.344                                          | Propanoic acid                | C <sub>3</sub> H <sub>6</sub> O <sub>2</sub>   | 79-09-4    | 699                             | 700                            | 1.17 (13)     | 0.90 (17)     | -             | 0.31 (6)      | [3]  |                                                        |  |  |  |
| 6                              | 170                                            | 3.904                                          | 2-Methylpropanoic acid        | C <sub>4</sub> H <sub>8</sub> O <sub>2</sub>   | 79-31-2    | 768                             | 775                            | 12.28 (11)    | 8.43 (15)     | 4.49 (15)     | 5.93 (8)      | [4]  |                                                        |  |  |  |
| 7                              | 190                                            | 4.640                                          | Butanoic acid                 | C <sub>4</sub> H <sub>8</sub> O <sub>2</sub>   | 107-92-6   | 805                             | 821                            | 8.17 (4)      | 4.02 (8)      | 2.86 (8)      | 4.09 (18)     | [5]  |                                                        |  |  |  |
| 8                              | 235                                            | 4.056                                          | Isovaleric acid               | C <sub>5</sub> H <sub>10</sub> O <sub>2</sub>  | 503-74-2   | 858                             | 864                            | 11.36 (18)    | 7.59 (7)      | 4.08 (11)     | 5.93 (12)     | [6]  |                                                        |  |  |  |
| 9                              | 245                                            | 3.776                                          | 2-Methylbutanoic acid         | C <sub>5</sub> H <sub>10</sub> O <sub>2</sub>  | 116-53-0   | 869                             | 873                            | 6.27 (26)     | 5.33 (6)      | 2.50 (15)     | 2.82 (12)     | [5]  |                                                        |  |  |  |
| 10                             | 365                                            | 3.648                                          | Hexanoic acid                 | C <sub>6</sub> H <sub>12</sub> O <sub>2</sub>  | 142-62-1   | 999                             | 1019                           | 37.94 (13)    | 9.07 (8)      | 18.35 (13)    | 19.46 (19)    | [5]  |                                                        |  |  |  |
| 11                             | 545                                            | 2.616                                          | Octanoic acid                 | C <sub>8</sub> H <sub>16</sub> O <sub>2</sub>  | 124-07-2   | 1197                            | 1182                           | 214.92 (6)    | 141.41 (20)   | 131.62 (12)   | 141.76 (17)   | [7]  |                                                        |  |  |  |
| 12                             | 615                                            | 2.448                                          | Nonanoic acid                 | C <sub>9</sub> H <sub>18</sub> O <sub>2</sub>  | 112-05-0   | 1279                            | 1280                           | 9.36 (161)    | 0.39 (49)     | -             | -             | [8]  |                                                        |  |  |  |
| 13                             | 695                                            | 2.616                                          | Dec-9-enoic acid              | C <sub>10</sub> H <sub>18</sub> O <sub>2</sub> | 14436-32-9 | 1378                            | 1389                           | 13.91 (12)    | 12.03 (65)    | -             | -             | [9]  |                                                        |  |  |  |
| 14                             | 700                                            | 2.184                                          | Decanoic acid                 | C <sub>10</sub> H <sub>20</sub> O <sub>2</sub> | 334-48-5   | 1378                            | 1380                           | 97.46 (17)    | 50.06 (8)     | 63.33 (18)    | 73.65 (14)    | [10] |                                                        |  |  |  |
| <b>Subtotal (GC Peak Area)</b> |                                                |                                                |                               |                                                |            |                                 |                                | <b>476.78</b> | <b>302.34</b> | <b>268.07</b> | <b>255.45</b> |      |                                                        |  |  |  |
| <b>Subtotal (%)</b>            |                                                |                                                |                               |                                                |            |                                 |                                | <b>45.47</b>  | <b>41.48</b>  | <b>38.51</b>  | <b>33.44</b>  |      |                                                        |  |  |  |
| <b>Alcohols</b>                |                                                |                                                |                               |                                                |            |                                 |                                |               |               |               |               |      |                                                        |  |  |  |
| <b>Aliphatics</b>              |                                                |                                                |                               |                                                |            |                                 |                                |               |               |               |               |      |                                                        |  |  |  |
| 15                             | 85                                             | 0.648                                          | 1-Propanol                    | C <sub>3</sub> H <sub>8</sub> O                | 71-23-8    | 591                             | 574                            | 3.29 (12)     | 3.45 (9)      | 2.41 (16)     | 2.51 (12)     | [11] |                                                        |  |  |  |
| 16                             | 100                                            | 0.712                                          | 2-Methyl-1-propanol           | C <sub>4</sub> H <sub>10</sub> O               | 78-83-1    | 621                             | 615                            | 11.88 (25)    | 8.84 (10)     | 15.61 (11)    | 12.41 (11)    | [12] |                                                        |  |  |  |
| 17                             | 105                                            | 0.568                                          | 2-Methyl-2-butanol            | C <sub>5</sub> H <sub>12</sub> O               | 75-85-4    | 631                             | 622                            | 1.87 (67)     | 2.36 (13)     | 1.49 (25)     | 1.38 (50)     | [12] |                                                        |  |  |  |
| 18                             | 115                                            | 0.784                                          | 1-Butanol                     | C <sub>4</sub> H <sub>10</sub> O               | 71-36-3    | 652                             | 646                            | 1.18 (24)     | 1.38 (19)     | 0.91 (24)     | 0.74 (11)     | [13] |                                                        |  |  |  |
| 19                             | 130                                            | 0.696                                          | 2-Pentanol                    | C <sub>5</sub> H <sub>12</sub> O               | 6032-29-7  | 681                             | 685                            | -             | 0.04 (19)     | -             | - (13)        | [14] |                                                        |  |  |  |
| 20                             | 145                                            | 0.640                                          | 2-Methyl-2-pentanol           | C <sub>6</sub> H <sub>14</sub> O               | 590-36-3   | 721                             | 698                            | 0.47 (82)     | 0.36 (13)     | 0.26 (16)     | 0.35 (8)      | [12] |                                                        |  |  |  |
| 21                             | 150                                            | 0.944                                          | 3-Methyl-1-butanol            | C <sub>5</sub> H <sub>12</sub> O               | 123-51-3   | 722                             | 706                            | 35.55 (20)    | 32.61 (16)    | 33.68 (23)    | 38.32 (22)    | [12] |                                                        |  |  |  |
| 22                             | 155                                            | 0.864                                          | 2-Methyl-1-butanol            | C <sub>5</sub> H <sub>12</sub> O               | 137-32-6   | 732                             | 739                            | -             | -             | 16.93 (5)     | 16.58 (7)     | [2]  |                                                        |  |  |  |
| 23                             | 165                                            | 0.720                                          | 4-Methyl-2-pentanol           | C <sub>6</sub> H <sub>14</sub> O               | 108-11-2   | 751                             | 758                            | 0.08 (15)     | 0.06 (14)     | 0.08 (19)     | 0.09 (15)     | [3]  |                                                        |  |  |  |
| 24                             | 175                                            | 0.912                                          | 1-Pentanol                    | C <sub>5</sub> H <sub>12</sub> O               | 71-41-0    | 772                             | 776                            | 0.40 (10)     | -             | -             | -             | [15] |                                                        |  |  |  |
| 25                             | 180                                            | 1.184                                          | 3-Methyl-2-buten-1-ol         | C <sub>5</sub> H <sub>10</sub> O               | 556-82-1   | 782                             | 778                            | 0.17 (35)     | -             | -             | -             | [8]  |                                                        |  |  |  |
| 26                             | 185                                            | 0.632                                          | 2,4-Dimethyl-2-pentanol       | C <sub>7</sub> H <sub>16</sub> O               | 625-06-9   | 791                             | -                              | 0.12 (33)     | 0.16 (24)     | 0.12 (2)      | 0.11 (26)     |      |                                                        |  |  |  |
| 27                             | 220                                            | 0.672                                          | 2-Methyl-2-hexanol            | C <sub>7</sub> H <sub>16</sub> O               | 625-23-0   | 836                             | -                              | 0.10 (24)     | 0.09 (18)     | 0.08 (21)     | 0.08 (22)     |      |                                                        |  |  |  |
| 28                             | 225                                            | 0.904                                          | 2-Methyl-1-pentanol           | C <sub>6</sub> H <sub>14</sub> O               | 105-30-6   | 842                             | 843                            | 0.56 (7)      | -             | 0.28 (3)      | 0.29 (3)      | [16] |                                                        |  |  |  |

|                                |     |       |                                                  |                                               |            |      |      |               |               |               |               |      |
|--------------------------------|-----|-------|--------------------------------------------------|-----------------------------------------------|------------|------|------|---------------|---------------|---------------|---------------|------|
| 29                             | 260 | 0.944 | 1-Hexanol                                        | C <sub>6</sub> H <sub>14</sub> O              | 111-27-3   | 883  | 874  | 0.10 (5)      | 0.08 (58)     | -             | -             | [17] |
| 30                             | 280 | 0.792 | 2-Heptanol                                       | C <sub>7</sub> H <sub>16</sub> O              | 543-49-7   | 906  | 904  | 0.07 (25)     | -             | 0.10 (10)     | 0.09 (9)      | [11] |
| 31                             | 305 | 0.664 | 4-Methyl-4-heptanol                              | C <sub>8</sub> H <sub>18</sub> O              | 598-01-6   | 932  | -    | 0.53 (29)     | 0.45 (11)     | 0.45 (22)     | 0.48 (9)      |      |
| 32                             | 305 | 0.680 | 2-Methyl-2-heptanol                              | C <sub>8</sub> H <sub>18</sub> O              | 625-25-2   | 932  | -    | 0.63 (31)     | 0.44 (12)     | 0.46 (20)     | 0.45 (18)     |      |
| 33                             | 330 | 0.768 | 4-Methyl-2-heptanol                              | C <sub>8</sub> H <sub>18</sub> O              | 56298-90-9 | 959  | 950  | 4.54 (22)     | 3.91 (19)     | 3.15 (6)      | 3.42 (5)      | [18] |
| 34                             | 345 | 0.960 | 1-Heptanol                                       | C <sub>7</sub> H <sub>16</sub> O              | 111-70-6   | 975  | 974  | 3.00 (42)     | 3.71 (9)      | 0.45 (8)      | 0.74 (13)     | [15] |
| 35                             | 350 | 0.656 | 2,3-Dimethyl-2-hexanol                           | C <sub>8</sub> H <sub>18</sub> O              | 19550-03-9 | 980  | -    | 6.23 (16)     | 5.68 (16)     | 6.21 (6)      | 6.31 (6)      |      |
| 36                             | 355 | 0.624 | 3-Ethyl-2-methyl-3-pentanol                      | C <sub>8</sub> H <sub>18</sub> O              | 597-05-7   | 985  | -    | 0.66 (20)     | 0.54 (16)     | 0.59 (13)     | 0.62 (7)      |      |
| 37                             | 360 | 0.760 | 2-Methyl-2-octen-4-ol                            | C <sub>9</sub> H <sub>18</sub> O              | -          | 990  | -    | 0.36 (22)     | -             | 0.57 (10)     | 0.29 (19)     |      |
| 38                             | 380 | 0.728 | C <sub>8</sub> Alcohol ( <i>m/z</i> 45, 57, 69)  | C <sub>8</sub> H <sub>18</sub> O              | -          | 1011 | -    | 0.76 (10)     | 0.78 (15)     | 0.63 (17)     | 0.66 (10)     |      |
| 39                             | 395 | 0.656 | 4-Methyl-4-octanol                               | C <sub>9</sub> H <sub>20</sub> O              | 23418-37-3 | 1027 | -    | 0.57 (25)     | 0.43 (20)     | 0.50 (8)      | 0.54 (4)      |      |
| 40                             | 395 | 0.688 | 4,5-Dimethyl-3-heptanol                          | C <sub>9</sub> H <sub>20</sub> O              | -          | 1027 | -    | -             | -             | 0.33 (49)     | 0.43 (7)      |      |
| 41                             | 400 | 0.624 | 2-Methyl-2-octanol                               | C <sub>9</sub> H <sub>20</sub> O              | 628-44-4   | 1032 | 1033 | 0.77 (11)     | 0.83 (15)     | 0.63 (11)     | 0.65 (20)     | [19] |
| 42                             | 400 | 0.872 | 2-Ethyl-1-hexanol                                | C <sub>8</sub> H <sub>18</sub> O              | 104-76-7   | 1033 | 1038 | 8.29 (20)     | 6.23 (19)     | 5.52 (12)     | 6.05 (2)      | [17] |
| 43                             | 430 | 1.800 | 2,5-Dimethyl-2,5-hexanediol                      | C <sub>8</sub> H <sub>18</sub> O <sub>2</sub> | 110-03-2   | 1065 | -    | 0.66 (32)     | 0.11 (59)     | -             | 0.40 (16)     |      |
| 44                             | 435 | 0.744 | C <sub>8</sub> Alcohol ( <i>m/z</i> 45, 55, 70)  | C <sub>8</sub> H <sub>18</sub> O              | -          | 1069 | -    | 0.56 (25)     | -             | -             | -             |      |
| 45                             | 445 | 0.888 | 1-Octanol                                        | C <sub>8</sub> H <sub>18</sub> O              | 111-87-5   | 1075 | 1079 | 0.87 (18)     | 1.11 (15)     | 1.54 (13)     | 1.63 (34)     | [17] |
| 46                             | 450 | 0.632 | 2,4-Dimethyl-3-hexanol                           | C <sub>8</sub> H <sub>18</sub> O              | 13432-25-2 | 1085 | -    | 0.28 (40)     | 0.22 (5)      | 0.25 (5)      | 0.17 (5)      |      |
| 47                             | 455 | 0.840 | 2,4-Dimethyl-1-heptanol                          | C <sub>9</sub> H <sub>20</sub> O              | -          | 1090 | -    | -             | -             | 4.61 (25)     | 1.89 (14)     |      |
| 48                             | 460 | 0.896 | 2,3,4-Trimethyl-5-hexen-3-ol                     | C <sub>9</sub> H <sub>18</sub> O              | 28638-29-1 | 1090 | -    | 1.54 (35)     | 0.83 (12)     | 5.36 (22)     | 0.76 (40)     |      |
| 49                             | 465 | 0.768 | 2-Nonanol                                        | C <sub>9</sub> H <sub>20</sub> O              | 628-99-9   | 1101 | 1098 | 0.22 (9)      | -             | 0.17 (6)      | 0.20 (14)     | [8]  |
| 50                             | 465 | 1.008 | 2-Nonen-1-ol                                     | C <sub>9</sub> H <sub>18</sub> O              | 31502-14-4 | 1101 | 1074 | 1.43 (22)     | -             | -             | -             | [20] |
| 51                             | 480 | 0.640 | 4-Ethyl-4-heptanol                               | C <sub>9</sub> H <sub>20</sub> O              | 597-90-0   | 1118 | -    | -             | 0.21 (17)     | -             | -             |      |
| 52                             | 485 | 0.648 | 4-Methyl-4-nonanol                               | C <sub>10</sub> H <sub>22</sub> O             | 23418-38-4 | 1124 | -    | 1.98 (19)     | 1.28 (15)     | 1.02 (10)     | 1.17 (7)      |      |
| 53                             | 495 | 0.616 | C <sub>10</sub> Alcohol ( <i>m/z</i> 41, 55, 59) | C <sub>10</sub> H <sub>22</sub> O             | -          | 1136 | -    | -             | -             | -             | 0.70 (20)     |      |
| 54                             | 525 | 0.616 | 3,4-Diethyl-3-hexanol                            | C <sub>10</sub> H <sub>22</sub> O             | 19398-78-8 | 1171 | -    | 7.02 (8)      | 6.79 (15)     | 6.10 (12)     | 5.53 (19)     |      |
| 55                             | 530 | 0.720 | C <sub>10</sub> Alcohol ( <i>m/z</i> 45, 55, 70) | C <sub>10</sub> H <sub>22</sub> O             | -          | 1177 | -    | -             | 0.14 (27)     | 1.47 (16)     | 3.95 (11)     |      |
| 56                             | 545 | 0.832 | 1-Nonanol                                        | C <sub>9</sub> H <sub>20</sub> O              | 143-08-8   | 1195 | 1179 | 5.04 (61)     | 3.01 (21)     | 3.17 (26)     | 3.95 (12)     | [17] |
| 57                             | 555 | 0.680 | 2-Decanol                                        | C <sub>10</sub> H <sub>22</sub> O             | 1120-06-5  | 1207 | 1209 | 3.16 (14)     | 2.32 (12)     | 1.14 (26)     | 1.25 (38)     | [21] |
| 58                             | 565 | 0.616 | 3-Decanol                                        | C <sub>10</sub> H <sub>22</sub> O             | 1565-81-7  | 1218 | 1197 | 6.12 (21)     | 4.93 (32)     | 5.30 (17)     | -             | [8]  |
| 59                             | 620 | 0.832 | 1-Decanol                                        | C <sub>10</sub> H <sub>22</sub> O             | 112-30-1   | 1283 | 1281 | 1.96 (16)     | 2.84 (22)     | 3.10 (15)     | 3.08 (23)     | [17] |
| 60                             | 650 | 0.440 | 2-Butyl-1-octanol                                | C <sub>12</sub> H <sub>26</sub> O             | 3913-02-8  | 1319 | -    | 0.41 (21)     | -             | -             | -             |      |
| <b>Aromatics</b>               |     |       |                                                  |                                               |            |      |      |               |               |               |               |      |
| 61                             | 450 | 1.600 | 2-Phenylisopropanol                              | C <sub>9</sub> H <sub>12</sub> O              | 617-94-7   | 1086 | 1080 | -             | -             | -             | 0.12 (13)     | [22] |
| 62                             | 480 | 2.272 | 2-Phenylethanol                                  | C <sub>8</sub> H <sub>10</sub> O              | 60-12-8    | 1121 | 1110 | 78.54 (20)    | 30.40 (19)    | 45.23 (10)    | 58.52 (2)     | [8]  |
| <b>Cyclic</b>                  |     |       |                                                  |                                               |            |      |      |               |               |               |               |      |
| 63                             | 365 | 0.688 | 1-Cyclopentyl-1-propanol                         | C <sub>8</sub> H <sub>16</sub> O              | -          | 995  | -    | -             | -             | -             | 0.19 (8)      |      |
| <b>Subtotal (GC Peak Area)</b> |     |       |                                                  |                                               |            |      |      | <b>191.93</b> | <b>126.64</b> | <b>165.07</b> | <b>177.18</b> |      |
| <b>Subtotal (%)</b>            |     |       |                                                  |                                               |            |      |      | <b>18.30</b>  | <b>17.37</b>  | <b>23.71</b>  | <b>23.19</b>  |      |
| <b>Aldehydes</b>               |     |       |                                                  |                                               |            |      |      |               |               |               |               |      |
| <b>Aliphatics</b>              |     |       |                                                  |                                               |            |      |      |               |               |               |               |      |
| 64                             | 85  | 0.408 | Butanal                                          | C <sub>4</sub> H <sub>8</sub> O               | 123-72-8   | 591  | 614  | 1.38 (85)     | -             | 1.78 (20)     | 2.17 (18)     | [20] |
| 65                             | 110 | 0.464 | 3-Methyl-butanal                                 | C <sub>5</sub> H <sub>10</sub> O              | 590-86-3   | 641  | 649  | 6.65 (33)     | 6.52 (29)     | 5.68 (27)     | 7.44 (19)     | [11] |
| 66                             | 115 | 0.456 | 2-Methyl-butanal                                 | C <sub>5</sub> H <sub>10</sub> O              | 96-17-3    | 651  | 646  | 3.92 (46)     | 3.17 (34)     | 4.04 (12)     | 4.37 (5)      | [23] |
| 67                             | 425 | 0.736 | 2-Octenal                                        | C <sub>8</sub> H <sub>14</sub> O              | 2548-87-0  | 1059 | 1056 | -             | 2.60 (4)      | 0.81 (83)     | 0.70 (9)      | [15] |

|                                |     |       |                                        |                                               |            |      |      |              |              |              |              |      |
|--------------------------------|-----|-------|----------------------------------------|-----------------------------------------------|------------|------|------|--------------|--------------|--------------|--------------|------|
| 68                             | 605 | 0.728 | 2-Decenal                              | C <sub>10</sub> H <sub>18</sub> O             | 3913-81-3  | 1266 | 1261 | 1.60 (12)    | -            | -            | -            | [8]  |
| <b>Aromatics</b>               |     |       |                                        |                                               |            |      |      |              |              |              |              |      |
| 69                             | 335 | 1.288 | Benzaldehyde                           | C <sub>7</sub> H <sub>6</sub> O               | 100-52-7   | 965  | 964  | 9.91 (62)    | 1.65 (19)    | 3.45 (15)    | 7.20 (20)    | [20] |
| 70                             | 410 | 1.344 | 2-Phenylacetaldehyde                   | C <sub>8</sub> H <sub>8</sub> O               | 122-78-1   | 1044 | 1043 | 11.25 (51)   | 3.22 (10)    | 5.28 (4)     | 7.61 (12)    | [8]  |
| 71                             | 410 | 1.528 | 2-Hydroxy benzaldehyde                 | C <sub>7</sub> H <sub>6</sub> O <sub>2</sub>  | 90-02-8    | 1044 | 1041 | 0.08 (53)    | -            | -            | -            | [8]  |
| 72                             | 565 | 1.208 | 3,5-Dimethyl-benzaldehyde              | C <sub>9</sub> H <sub>10</sub> O              | 5779-95-3  | 1219 | -    | 6.55 (15)    | -            | 1.27 (16)    | -            |      |
| 73                             | 615 | 1.312 | 2-Phenyl-2-butenal                     | C <sub>10</sub> H <sub>10</sub> O             | 4411-89-6  | 1278 | 1273 | 0.17 (37)    | -            | -            | -            | [24] |
| <b>Subtotal (GC Peak Area)</b> |     |       |                                        |                                               |            |      |      | <b>41.50</b> | <b>17.16</b> | <b>22.32</b> | <b>29.49</b> |      |
| <b>Subtotal (%)</b>            |     |       |                                        |                                               |            |      |      | <b>3.96</b>  | <b>2.35</b>  | <b>3.21</b>  | <b>3.86</b>  |      |
| <b>Ketones</b>                 |     |       |                                        |                                               |            |      |      |              |              |              |              |      |
| <b>Aliphatics</b>              |     |       |                                        |                                               |            |      |      |              |              |              |              |      |
| 74                             | 90  | 0.552 | 2,3-Butanedione                        | C <sub>4</sub> H <sub>6</sub> O <sub>2</sub>  | 431-03-8   | 601  | 592  | -            | -            | -            | 0.29 (12)    | [2]  |
| 75                             | 95  | 0.448 | 2-Butanone                             | C <sub>4</sub> H <sub>8</sub> O               | 78-93-3    | 611  | 601  | -            | -            | 0.50 (3)     | 0.56 (13)    | [20] |
| 76                             | 125 | 0.504 | 2-Pentanone                            | C <sub>5</sub> H <sub>10</sub> O              | 107-87-9   | 671  | 686  | 1.04 (44)    | 0.95 (22)    | 0.97 (12)    | 1.04 (14)    | [25] |
| 77                             | 125 | 0.624 | 2,3-Pentanedione                       | C <sub>5</sub> H <sub>8</sub> O <sub>2</sub>  | 600-14-6   | 671  | 693  | -            | 0.14 (54)    | 0.33 (45)    | 0.31 (15)    | [3]  |
| 78                             | 140 | 1.232 | 3-Hydroxy-2-butanone                   | C <sub>4</sub> H <sub>8</sub> O <sub>2</sub>  | 513-86-0   | 702  | 733  | 5.43 (77)    | 3.34 (72)    | 5.24 (46)    | 5.29 (17)    | [15] |
| 79                             | 150 | 0.512 | 4-Methyl-2-pentanone                   | C <sub>6</sub> H <sub>12</sub> O              | 180-10-1   | 721  | 736  | 1.50 (25)    | 1.36 (20)    | 1.27 (14)    | 1.26 (11)    | [3]  |
| 80                             | 185 | 0.576 | 2-Hexanone                             | C <sub>6</sub> H <sub>12</sub> O              | 591-78-6   | 791  | 787  | 0.39 (26)    | -            | 0.38 (8)     | 0.37 (12)    | [11] |
| 81                             | 190 | 0.648 | 4-Methyl-3-penten-2-one                | C <sub>6</sub> H <sub>10</sub> O              | 141-79-7   | 801  | 801  | 0.82 (63)    | -            | 0.37 (9)     | 0.37 (12)    | [12] |
| 82                             | 195 | 1.216 | 3-Hydroxy-2-pentanone                  | C <sub>5</sub> H <sub>10</sub> O <sub>2</sub> | 3142-66-3  | 807  | 803  | 0.13 (45)    | 0.49 (15)    | 0.11 (17)    | 0.14 (23)    | [26] |
| 83                             | 220 | 0.616 | 2,3-Heptanedione                       | C <sub>7</sub> H <sub>12</sub> O <sub>2</sub> | 96-04-8    | 836  | -    | -            | 0.07 (15)    | -            | 0.07 (15)    |      |
| 84                             | 230 | 0.568 | 4-Methyl-2-hexanone                    | C <sub>7</sub> H <sub>14</sub> O              | 105-42-0   | 848  | 846  | 0.31 (48)    | 0.26 (16)    | 0.29 (8)     | 0.29 (10)    | [27] |
| 85                             | 230 | 1.120 | 4-Hydroxy-4-methyl-2-pentanone         | C <sub>6</sub> H <sub>12</sub> O <sub>2</sub> | 123-42-2   | 848  | 840  | 0.25 (135)   | -            | -            | -            | [28] |
| 86                             | 240 | 0.584 | 5-Methyl-2-hexanone                    | C <sub>7</sub> H <sub>14</sub> O              | 110-12-3   | 860  | 857  | 0.68 (30)    | 0.55 (16)    | -            | -            | [29] |
| 87                             | 270 | 0.600 | 2-Heptanone                            | C <sub>7</sub> H <sub>14</sub> O              | 110-43-0   | 895  | 895  | 3.07 (37)    | 2.46 (52)    | 4.70 (20)    | 4.92 (10)    | [15] |
| 88                             | 280 | 0.552 | 3,4-Dimethyl-2-hexanone                | C <sub>8</sub> H <sub>16</sub> O              | 19550-10-8 | 906  | -    | 0.24 (31)    | 0.18 (36)    | 0.20 (14)    | 0.20 (17)    |      |
| 89                             | 305 | 0.560 | 6-Methyl-2-heptanone                   | C <sub>8</sub> H <sub>16</sub> O              | 928-68-7   | 932  | 958  | -            | 7.84 (19)    | 9.17 (7)     | 9.36 (9)     | [15] |
| 90                             | 305 | 1.368 | 2,5-Hexanedione                        | C <sub>6</sub> H <sub>10</sub> O <sub>2</sub> | 110-13-4   | 933  | 933  | 0.65 (29)    | 0.29 (18)    | 0.26 (18)    | 0.26 (10)    | [10] |
| 91                             | 315 | 0.584 | 4-Methyl-2-heptanone                   | C <sub>8</sub> H <sub>16</sub> O              | 6137-06-0  | 943  | 936  | 15.10 (15)   | 15.40 (9)    | 15.00 (9)    | 15.60 (10)   | [27] |
| 92                             | 320 | 1.040 | 2,5-Dimethyl-3-hexanone                | C <sub>8</sub> H <sub>16</sub> O              | 1888-57-9  | 948  | -    | -            | 0.22 (70)    | -            | -            |      |
| 93                             | 330 | 0.472 | 2,3-Octanedione                        | C <sub>8</sub> H <sub>14</sub> O <sub>2</sub> | 585-25-1   | 958  | 980  | -            | 0.13 (12)    | 0.10 (18)    | 0.11 (13)    | [3]  |
| 94                             | 330 | 0.624 | 4-Methyl-3-hepten-2-one (isomer)       | C <sub>8</sub> H <sub>14</sub> O              | 22319-25-1 | 959  | -    | 0.28 (23)    | 0.20 (24)    | -            | -            |      |
| 95                             | 345 | 0.568 | 4-Octanone                             | C <sub>8</sub> H <sub>16</sub> O              | 589-63-9   | 974  | 974  | 0.24 (19)    | 0.16 (14)    | 0.16 (20)    | -            | [3]  |
| 96                             | 350 | 0.520 | 2,4-Dimethyl-3-heptanone               | C <sub>9</sub> H <sub>18</sub> O              | 18641-71-9 | 979  | -    | -            | -            | 0.19 (25)    | 0.32 (8)     |      |
| 97                             | 355 | 0.544 | C <sub>9</sub> Ketone (m/z 43, 57, 86) | C <sub>9</sub> H <sub>18</sub> O              | -          | 985  | -    | 0.49 (32)    | 0.48 (20)    | 0.48 (10)    | 0.65 (32)    |      |
| 98                             | 360 | 0.584 | C <sub>9</sub> Ketone (m/z 57, 72, 99) | C <sub>9</sub> H <sub>18</sub> O              | -          | 990  | -    | 7.15 (18)    | 7.25 (3)     | 9.92 (13)    | 7.49 (6)     |      |
| 99                             | 360 | 0.664 | 4-Methyl-3-hepten-2-one (isomer)       | C <sub>8</sub> H <sub>14</sub> O              | 22319-25-1 | 990  | -    | 0.70 (17)    | -            | 0.54 (15)    | 0.66 (12)    |      |
| 100                            | 395 | 0.568 | C <sub>9</sub> Ketone (m/z 43, 71)     | C <sub>9</sub> H <sub>18</sub> O              | 6137-15-1  | 1027 | -    | -            | -            | -            | 0.10 (8)     |      |
| 101                            | 400 | 0.608 | 2-Methyl-2-octen-4-one                 | C <sub>9</sub> H <sub>16</sub> O              | -          | 1032 | -    | 0.28 (13)    | 0.26 (8)     | 0.23 (3)     | 0.24 (2)     |      |
| 102                            | 405 | 0.592 | C <sub>9</sub> Ketone (m/z 43, 58, 85) | C <sub>9</sub> H <sub>18</sub> O              | -          | 1038 | -    | 1.49 (26)    | 1.28 (16)    | 1.27 (9)     | 1.26 (20)    |      |
| 103                            | 410 | 0.704 | 3,3,6-Trimethylhepta-1,5-dien-4-one    | C <sub>10</sub> H <sub>16</sub> O             | 546-49-6   | 1043 | 1062 | 0.54 (30)    | 0.37 (6)     | 0.39 (19)    | 0.40 (15)    | [8]  |
| 104                            | 430 | 0.696 | 5-Nonen-2-one                          | C <sub>9</sub> H <sub>16</sub> O              | 27039-84-5 | 1064 | -    | 0.87 (30)    | 0.70 (15)    | 0.46 (1)     | 0.63 (19)    |      |
| 105                            | 440 | 0.576 | 5-Nonanone                             | C <sub>9</sub> H <sub>18</sub> O              | 502-56-7   | 1074 | 1073 | 0.60 (34)    | 0.34 (36)    | 0.51 (19)    | -            | [3]  |
| 106                            | 450 | 0.584 | 3,5-Dimethyl-2-octanone                | C <sub>10</sub> H <sub>20</sub> O             | 19781-14-7 | 1085 | -    | 0.12 (24)    | 0.10 (8)     | 0.08 (14)    | 0.10 (11)    |      |
| 107                            | 455 | 0.624 | 2-Nonanone                             | C <sub>9</sub> H <sub>18</sub> O              | 821-55-6   | 1090 | 1093 | 3.94 (35)    | 3.03 (21)    | 4.54 (14)    | 6.19 (1)     | [20] |

|                                |     |       |                                  |                                                |            |      |      |              |              |              |              |      |
|--------------------------------|-----|-------|----------------------------------|------------------------------------------------|------------|------|------|--------------|--------------|--------------|--------------|------|
| 108                            | 475 | 0.752 | 2,6-Dimethyl-2,5-heptadien-4-one | C <sub>9</sub> H <sub>14</sub> O               | 504-20-1   | 1113 | -    | 7.55 (13)    | 6.39 (7)     | 5.68 (11)    | 6.08 (10)    |      |
| 109                            | 480 | 0.560 | 4-Decanone                       | C <sub>10</sub> H <sub>20</sub> O              | 624-16-8   | 1118 | -    | 0.67 (12)    | 0.59 (17)    | 0.64 (12)    | 0.57 (2)     |      |
| 110                            | 540 | 0.608 | 3-Decanone                       | C <sub>10</sub> H <sub>20</sub> O              | 928-80-3   | 1189 | 1186 | 2.32 (34)    | 0.10 (13)    | 0.12 (29)    | 0.12 (20)    | [8]  |
| 111                            | 580 | 0.640 | 2-Methyl-2-nonen-4-one           | C <sub>10</sub> H <sub>18</sub> O              | 2903-23-3  | 1236 | 1215 | -            | -            | 0.43 (20)    | 0.43 (20)    | [30] |
| 112                            | 630 | 0.640 | 2-Undecanone                     | C <sub>11</sub> H <sub>22</sub> O              | 112-12-9   | 1295 | 1291 | 1.20 (16)    | -            | -            | -            | [17] |
| <b>Aromatics</b>               |     |       |                                  |                                                |            |      |      |              |              |              |              |      |
| 113                            | 430 | 1.288 | 1-Phenylethanone                 | C <sub>8</sub> H <sub>8</sub> O                | 98-86-2    | 1065 | 1067 | 2.64 (12)    | 0.57 (11)    | -            | -            | [15] |
| 114                            | 490 | 1.248 | 1-Phenylpropan-2-one             | C <sub>9</sub> H <sub>10</sub> O               | 103-79-7   | 1131 | 1124 | 0.15 (1)     | -            | -            | -            | [31] |
| 115                            | 495 | 0.968 | 1-(2-Methylphenyl)ethanone       | C <sub>9</sub> H <sub>10</sub> O               | 577-16-2   | 1136 | 1139 | 0.09 (21)    | -            | -            | -            | [32] |
| 116                            | 540 | 1.192 | 1-(4-Methylphenyl)ethanone       | C <sub>9</sub> H <sub>10</sub> O               | 122-00-9   | 1190 | 1182 | 0.08 (25)    | 0.06 (20)    | -            | -            | [8]  |
| 117                            | 575 | 1.112 | 1-Phenyl-2-butanone              | C <sub>10</sub> H <sub>12</sub> O              | 1007-32-5  | 1231 | -    | 0.10 (6)     | 0.05 (4)     | -            | -            |      |
| 118                            | 625 | 1.352 | 4-Phenyl-3-buten-2-one           | C <sub>10</sub> H <sub>10</sub> O              | 1896-62-4  | 1290 | 1330 | 0.10 (41)    | -            | -            | -            | [33] |
| 119                            | 650 | 1.208 | 1-(3,4-Dimethylphenyl)-ethanone  | C <sub>10</sub> H <sub>12</sub> O              | 03637-01-2 | 1320 | -    | 0.20 (21)    | 0.11 (30)    | -            | -            |      |
| <b>Cyclic</b>                  |     |       |                                  |                                                |            |      |      |              |              |              |              |      |
| 120                            | 270 | 0.808 | Cyclohexanone                    | C <sub>6</sub> H <sub>10</sub> O               | 108-94-1   | 895  | 895  | 0.41 (21)    | 0.31 (12)    | 0.40 (17)    | 0.36 (8)     | [10] |
| <b>Subtotal (GC Peak Area)</b> |     |       |                                  |                                                |            |      |      | <b>61.79</b> | <b>56.01</b> | <b>64.93</b> | <b>66.07</b> |      |
| <b>Subtotal (%)</b>            |     |       |                                  |                                                |            |      |      | <b>5.89</b>  | <b>7.68</b>  | <b>9.33</b>  | <b>8.65</b>  |      |
| <b>Terpenic compounds</b>      |     |       |                                  |                                                |            |      |      |              |              |              |              |      |
| 121                            | 365 | 0.504 | β-Myrcene                        | C <sub>10</sub> H <sub>16</sub>                | 123-35-3   | 995  | 986  | 0.50 (9)     | 0.27 (15)    | 0.20 (14)    | 0.24 (17)    | [34] |
| 122                            | 385 | 0.504 | α-Terpinene                      | C <sub>10</sub> H <sub>16</sub>                | 99-86-5    | 1016 | 1021 | 0.68 (147)   | -            | -            | -            | [35] |
| 123                            | 400 | 0.504 | Limonene                         | C <sub>10</sub> H <sub>16</sub>                | 138-86-3   | 1032 | 1027 | 0.22 (29)    | 0.91 (14)    | 0.38 (14)    | 0.46 (6)     | [35] |
| 124                            | 415 | 0.528 | β-Ocimene                        | C <sub>10</sub> H <sub>16</sub>                | 13877-91-3 | 1048 | 1042 | 0.39 (40)    | 0.25 (16)    | 0.13 (23)    | 0.18 (11)    | [35] |
| 125                            | 415 | 0.712 | Dihydromyrcenol                  | C <sub>10</sub> H <sub>20</sub> O              | 53219-21-9 | 1048 | 1076 | -            | 0.09 (37)    | -            | 0.15 (13)    | [36] |
| 126                            | 425 | 0.520 | γ-Terpinene                      | C <sub>10</sub> H <sub>16</sub>                | 99-85-4    | 1058 | 1061 | 0.54 (145)   | -            | -            | -            | [35] |
| 127                            | 440 | 0.648 | 6,10-Dihydromyrcenol             | C <sub>10</sub> H <sub>22</sub> O              | 18479-58-8 | 1074 | 1072 | 0.87 (14)    | 0.11 (18)    | 0.10 (4)     | 0.11 (15)    | [37] |
| 128                            | 455 | 0.528 | α-Terpinolene                    | C <sub>10</sub> H <sub>16</sub>                | 586-62-9   | 1090 | 1093 | 1.31 (155)   | 0.11 (17)    | -            | -            | [35] |
| 129                            | 465 | 0.816 | Linalool                         | C <sub>10</sub> H <sub>18</sub> O              | 78-70-6    | 1101 | 1107 | 21.43 (25)   | 6.26 (6)     | 3.59 (12)    | 4.24 (4)     | [35] |
| 130                            | 545 | 0.920 | α-Terpineol                      | C <sub>10</sub> H <sub>18</sub> O              | 98-55-5    | 1195 | 1206 | 2.19 (3)     | 1.70 (16)    | 0.67 (14)    | 0.88 (14)    | [38] |
| 131                            | 585 | 1.016 | Nerol                            | C <sub>10</sub> H <sub>18</sub> O              | 106-25-2   | 1237 | 1242 | 0.55 (26)    | 0.48 (6)     | -            | 0.50 (16)    | [35] |
| 132                            | 590 | 1.024 | Isogeraniol                      | C <sub>10</sub> H <sub>18</sub> O              | 5944-20-7  | 1248 | 1248 | 2.44 (87)    | -            | -            | -            | [39] |
| 133                            | 605 | 1.048 | Geraniol                         | C <sub>10</sub> H <sub>18</sub> O              | 106-24-1   | 1266 | 1265 | 4.00 (6)     | 1.26 (19)    | 0.65 (17)    | 0.94 (10)    | [36] |
| 134                            | 610 | 0.848 | Citral                           | C <sub>10</sub> H <sub>16</sub> O              | 5392-40-5  | 1272 | 1240 | 0.26 (17)    | 0.22 (17)    | -            | -            | [40] |
| 135                            | 700 | 0.704 | Geranyl acetate                  | C <sub>12</sub> H <sub>20</sub> O <sub>2</sub> | 105-87-3   | 1382 | 1382 | 0.25 (22)    | -            | -            | -            | [41] |
| 136                            | 760 | 0.568 | β-Farnesene                      | C <sub>15</sub> H <sub>24</sub>                | 28973-97-9 | 1461 | 1465 | 0.48 (56)    | 0.47 (21)    | 0.36 (18)    | 0.43 (19)    | [38] |
| 137                            | 795 | 0.608 | α-Farnesene                      | C <sub>15</sub> H <sub>24</sub>                | 502-61-4   | 1508 | 1505 | 0.46 (8)     | -            | -            | 0.20 (16)    | [42] |
| 138                            | 835 | 0.840 | Nerolidol                        | C <sub>15</sub> H <sub>26</sub> O              | 40716-66-3 | 1566 | 1568 | 3.44 (22)    | 2.35 (7)     | 1.30 (18)    | 1.60 (11)    | [43] |
| <b>Subtotal (GC Peak Area)</b> |     |       |                                  |                                                |            |      |      | <b>40.02</b> | <b>14.47</b> | <b>7.40</b>  | <b>9.93</b>  |      |
| <b>Subtotal (%)</b>            |     |       |                                  |                                                |            |      |      | <b>3.82</b>  | <b>1.99</b>  | <b>1.06</b>  | <b>1.30</b>  |      |
| <b>Esters</b>                  |     |       |                                  |                                                |            |      |      |              |              |              |              |      |
| <b>Aliphatics</b>              |     |       |                                  |                                                |            |      |      |              |              |              |              |      |
| 139                            | 75  | 0.648 | Propyl formate                   | C <sub>4</sub> H <sub>8</sub> O <sub>2</sub>   | 110-74-7   | 571  | -    | -            | -            | 2.59 (9)     | 2.29 (3)     |      |
| 140                            | 100 | 0.456 | Ethyl acetate                    | C <sub>4</sub> H <sub>8</sub> O <sub>2</sub>   | 141-78-6   | 621  | 608  | 12.72 (14)   | 16.11 (34)   | 13.43 (16)   | 12.03 (2)    | [44] |
| 141                            | 135 | 0.472 | Ethyl propanoate                 | C <sub>5</sub> H <sub>10</sub> O <sub>2</sub>  | 105-37-3   | 691  | 714  | 1.46 (28)    | 1.36 (19)    | 0.84 (10)    | 0.91 (4)     | [8]  |
| 142                            | 140 | 0.488 | Propyl acetate                   | C <sub>5</sub> H <sub>10</sub> O <sub>2</sub>  | 109-60-4   | 701  | 712  | -            | -            | 0.16 (32)    | 0.15 (7)     | [10] |
| 143                            | 165 | 0.464 | Ethyl isobutyrate                | C <sub>6</sub> H <sub>12</sub> O <sub>2</sub>  | 97-62-1    | 751  | 747  | 0.32 (70)    | 0.19 (24)    | 0.12 (14)    | 0.13 (16)    | [45] |

|     |     |       |                                                      |                                                |            |      |      |            |            |            |            |      |
|-----|-----|-------|------------------------------------------------------|------------------------------------------------|------------|------|------|------------|------------|------------|------------|------|
| 144 | 175 | 0.496 | Isobutyl acetate                                     | C <sub>6</sub> H <sub>12</sub> O <sub>2</sub>  | 110-19-0   | 771  | 770  | -          | 0.47 (45)  | 0.88 (20)  | 0.81 (9)   | [14] |
| 145 | 185 | 0.560 | Isopentyl formate                                    | C <sub>6</sub> H <sub>12</sub> O <sub>2</sub>  | 110-45-2   | 791  | 792  | 0.28 (24)  | 0.24 (17)  | 0.20 (8)   | 0.24 (15)  | [46] |
| 146 | 195 | 0.520 | Ethyl butyrate                                       | C <sub>6</sub> H <sub>12</sub> O <sub>2</sub>  | 105-54-4   | 806  | 800  | 3.69 (20)  | 3.19 (28)  | 2.46 (14)  | 2.24 (8)   | [8]  |
| 147 | 200 | 0.472 | 1,1-Dimethylpropyl acetate                           | C <sub>7</sub> H <sub>14</sub> O <sub>2</sub>  | 625-16-1   | 812  | -    | -          | 0.38 (20)  | 0.39 (6)   | 0.29 (29)  |      |
| 148 | 205 | 1.152 | Ethyl 2-hydroxypropanoate                            | C <sub>5</sub> H <sub>10</sub> O <sub>3</sub>  | 97-64-3    | 819  | -    | 0.04 (18)  | -          | -          | -          |      |
| 149 | 230 | 0.624 | Ethyl 2-butenoate                                    | C <sub>6</sub> H <sub>10</sub> O <sub>2</sub>  | 10544-63-5 | 848  | 863  | 0.09 (29)  | 0.06 (20)  | -          | 0.06 (9)   | [47] |
| 150 | 235 | 0.496 | Ethyl 2-methylbutanoate                              | C <sub>7</sub> H <sub>14</sub> O <sub>2</sub>  | 7452-79-1  | 854  | 846  | -          | 0.14 (25)  | -          | -          | [48] |
|     |     |       |                                                      |                                                | 624-41-9 / |      |      |            |            |            |            | [10] |
| 151 | 255 | 0.552 | 2/3-Methylbutyl acetate                              | C <sub>7</sub> -H <sub>14</sub> O <sub>2</sub> | 123-92-2   | 877  | 880  | 12.89 (5)  | 12.80 (50) | 13.10 (18) | 12.86 (10) |      |
| 152 | 280 | 0.536 | Ethyl pentanoate                                     | C <sub>7</sub> H <sub>14</sub> O <sub>2</sub>  | 539-82-2   | 906  | 898  | 0.06 (21)  | -          | -          | -          | [8]  |
| 153 | 290 | 0.520 | 2-Hexyl acetate                                      | C <sub>8</sub> H <sub>16</sub> O <sub>2</sub>  | 142-92-7   | 916  | 1008 | -          | -          | 0.11 (13)  | 0.11 (37)  | [8]  |
| 154 | 325 | 1.112 | Methyl 2-hydroxy-4-methylpentanoate                  | C <sub>7</sub> H <sub>14</sub> O <sub>3</sub>  | 40348-72-9 | 954  | -    | -          | -          | -          | 0.30 (7)   |      |
| 155 | 340 | 0.536 | Pentyl propionate                                    | C <sub>8</sub> H <sub>16</sub> O <sub>2</sub>  | 624-54-4   | 969  | 972  | 0.38 (17)  | 0.18 (37)  | -          | 0.41 (33)  | [8]  |
| 156 | 345 | 0.664 | Methyl 2,4-dimethyl-3-oxopentanoate                  | C <sub>8</sub> H <sub>14</sub> O <sub>3</sub>  | -          | 974  | -    | 4.93 (19)  | 6.67 (10)  | 5.92 (6)   | 6.66 (10)  |      |
| 157 | 345 | 2.640 | 1,3-Propanediol diacetate                            | C <sub>7</sub> H <sub>12</sub> O <sub>4</sub>  | 628-66-0   | 976  | -    | 0.51 (18)  | 1.02 (21)  | -          | -          |      |
| 158 | 365 | 0.544 | Butyl butanoate                                      | C <sub>8</sub> H <sub>16</sub> O <sub>2</sub>  | 109-21-7   | 995  | 993  | 0.09 (28)  | 0.07 (17)  | -          | -          | [8]  |
| 159 | 370 | 0.552 | Ethyl hexanoate                                      | C <sub>8</sub> H <sub>16</sub> O <sub>2</sub>  | 123-66-0   | 1001 | 996  | 14.00 (3)  | 15.61 (10) | 14.90 (5)  | 13.04 (3)  | [8]  |
| 160 | 400 | 0.720 | Butyl pivalate                                       | C <sub>9</sub> H <sub>18</sub> O <sub>2</sub>  | 5129-37-3  | 1032 | -    | -          | -          | 0.08 (32)  | -          |      |
| 161 | 425 | 0.528 | 3-Methylbutyl butyrate                               | C <sub>9</sub> H <sub>18</sub> O <sub>2</sub>  | 106-27-4   | 1059 | 1060 | -          | 0.06 (47)  | -          | 0.04 (22)  | [8]  |
| 162 | 440 | 0.920 | Octyl formate                                        | C <sub>9</sub> H <sub>18</sub> O <sub>2</sub>  | 112-32-3   | 1075 | 1060 | -          | -          | 1.54 (13)  | 1.23 (18)  | [8]  |
| 163 | 460 | 0.560 | Ethyl heptanoate                                     | C <sub>9</sub> H <sub>18</sub> O <sub>2</sub>  | 106-30-9   | 1095 | 1095 | 0.63 (19)  | 0.61 (9)   | 0.39 (20)  | 0.37 (27)  | [8]  |
| 164 | 475 | 0.584 | Heptyl acetate                                       | C <sub>9</sub> H <sub>18</sub> O <sub>2</sub>  | 112-06-1   | 1113 | 1113 | -          | 0.17 (41)  | -          | -          | [8]  |
| 165 | 510 | 0.536 | Isobutyl hexanoate                                   | C <sub>10</sub> H <sub>20</sub> O <sub>2</sub> | 105-79-3   | 1154 | -    | 0.10 (31)  | 0.07 (2)   | -          | 0.06 (28)  |      |
| 166 | 540 | 0.616 | Ethyl 7-octenoate                                    | C <sub>10</sub> H <sub>18</sub> O <sub>2</sub> | 35194-38-8 | 1189 | 1186 | 0.59 (18)  | 0.54 (15)  | -          | -          | [49] |
| 167 | 545 | 0.640 | Ethyl octanoate                                      | C <sub>10</sub> H <sub>20</sub> O <sub>2</sub> | 106-32-1   | 1201 | 1195 | 54.29 (26) | 66.64 (25) | 5.18 (18)  | 61.62 (28) | [8]  |
| 168 | 595 | 0.552 | 3-Methylbutyl hexanoate                              | C <sub>11</sub> H <sub>22</sub> O <sub>2</sub> | 2198-61-0  | 1254 | 1250 | 0.97 (4)   | 0.59 (11)  | 0.61 (12)  | 0.62 (9)   | [10] |
| 169 | 605 | 0.944 | C <sub>11</sub> Ester ( <i>m/z</i> 42, 43, 113)      | C <sub>11</sub> H <sub>22</sub> O <sub>2</sub> | -          | 1266 | -    | 0.28 (14)  | -          | -          | -          |      |
| 170 | 630 | 0.560 | Propyl octanoate                                     | C <sub>11</sub> H <sub>22</sub> O <sub>2</sub> | 624-13-5   | 1295 | 1290 | 2.29 (34)  | 2.26 (4)   | -          | -          | [3]  |
| 171 | 630 | 0.576 | Ethyl nonanoate                                      | C <sub>11</sub> H <sub>22</sub> O <sub>2</sub> | 123-29-5   | 1295 | 1294 | 2.51 (13)  | 3.64 (20)  | 3.22 (17)  | 2.63 (20)  | [10] |
| 172 | 675 | 0.552 | Butyl octanoate                                      | C <sub>12</sub> H <sub>24</sub> O <sub>2</sub> | 589-75-3   | 1351 | 1387 | 0.60 (26)  | 0.31 (31)  | 0.28 (26)  | 0.30 (20)  | [50] |
| 173 | 690 | 0.848 | Butoxyethanol acetate                                | C <sub>10</sub> H <sub>20</sub> O <sub>4</sub> | 124-17-4   | 1364 | 1366 | 0.21 (2)   | -          | -          | -          | [51] |
|     |     |       |                                                      |                                                |            |      |      |            |            |            |            | [52] |
| 174 | 700 | 0.832 | 2-Methyl, 3-hydroxy-2,4,4-trimethylpentyl propanoate | C <sub>12</sub> H <sub>24</sub> O <sub>3</sub> | -          | 1382 | 1387 | 0.64 (11)  | -          | -          | 0.32 (19)  |      |
| 175 | 705 | 0.632 | Ethyl dec-9-enoate                                   | C <sub>12</sub> H <sub>22</sub> O <sub>2</sub> | 67233-91-4 | 1388 | 1387 | -          | -          | 14.81 (7)  | -          | [49] |
| 176 | 710 | 0.592 | Ethyl decanoate                                      | C <sub>12</sub> H <sub>24</sub> O <sub>2</sub> | 110-38-3   | 1395 | 1394 | 34.69 (15) | 13.17 (24) | 43.47 (20) | 67.08 (14) | [8]  |
| 177 | 720 | 0.608 | Decyl acetate                                        | C <sub>12</sub> H <sub>24</sub> O <sub>2</sub> | 112-17-4   | 1408 | 1408 | 0.32 (12)  | -          | -          | -          | [53] |
| 178 | 750 | 0.576 | 3-Methylbutyl octanoate                              | C <sub>13</sub> H <sub>26</sub> O <sub>2</sub> | 2035-99-6  | 1447 | 1444 | 3.41 (16)  | 2.11 (39)  | 1.93 (25)  | 2.00 (19)  | [44] |
| 179 | 780 | 0.608 | Propyl decanoate                                     | C <sub>13</sub> H <sub>26</sub> O <sub>2</sub> | 30673-60-0 | 1488 | 1493 | 0.59 (15)  | -          | -          | 0.15 (27)  | [46] |
| 180 | 820 | 0.616 | 2-Methylpropyl decanoate                             | C <sub>14</sub> H <sub>28</sub> O <sub>2</sub> | 30673-38-2 | 1544 | 1545 | 0.29 (34)  | -          | -          | -          | [54] |
| 181 | 855 | 0.624 | Ethyl dodecanoate                                    | C <sub>14</sub> H <sub>28</sub> O <sub>2</sub> | 106-33-2   | 1594 | 1595 | 7.99 (29)  | 3.88 (30)  | 2.69 (11)  | 3.81 (41)  | [8]  |
| 182 | 865 | 0.704 | Dodecyl acetate                                      | C <sub>14</sub> H <sub>28</sub> O <sub>2</sub> | 112-66-3   | 1608 | 1609 | 0.56 (26)  | -          | -          | -          | [55] |
| 183 | 890 | 0.688 | 3-Methylbutyl decanoate                              | C <sub>15</sub> H <sub>30</sub> O <sub>2</sub> | -          | 1641 | 1647 | -          | 0.59 (6)   | 0.72 (25)  | 0.81 (22)  | [56] |
|     |     |       | <b>Aromatics</b>                                     |                                                |            |      |      |            |            |            |            |      |
| 184 | 460 | 1.056 | Methyl benzoate                                      | C <sub>8</sub> H <sub>8</sub> O <sub>2</sub>   | 93-58-3    | 1096 | 1091 | 4.19 (9)   | 2.49 (2)   | 2.36 (11)  | 2.74 (16)  | [8]  |
| 185 | 520 | 1.112 | Benzyl acetate                                       | C <sub>9</sub> H <sub>10</sub> O <sub>2</sub>  | 140-11-4   | 1166 | 1163 | 0.25 (23)  | -          | -          | -          | [8]  |
| 186 | 525 | 0.944 | Ethyl benzoate                                       | C <sub>9</sub> H <sub>10</sub> O <sub>2</sub>  | 93-89-0    | 1172 | 1170 | 0.12 (2)   | 0.08 (20)  | -          | -          | [8]  |

|                                |     |       |                                              |                                                |            |      |      |               |               |               |               |      |
|--------------------------------|-----|-------|----------------------------------------------|------------------------------------------------|------------|------|------|---------------|---------------|---------------|---------------|------|
| 187                            | 590 | 1.000 | Ethylphenyl acetate                          | C <sub>10</sub> H <sub>12</sub> O <sub>2</sub> | 101-97-3   | 1248 | 1244 | 0.25 (18)     | -             | 0.07 (18)     | 0.12 (45)     | [10] |
| 188                            | 600 | 1.040 | 2-Phenylethyl acetate                        | C <sub>10</sub> H <sub>10</sub> O <sub>2</sub> | 103-45-7   | 1260 | 1256 | 4.34 (3)      | 1.43 (15)     | 2.37 (32)     | 3.11 (40)     | [8]  |
| 189                            | 675 | 0.960 | Ethyl 3-phenylpropanoate                     | C <sub>11</sub> H <sub>14</sub> O <sub>2</sub> | 2021-28-5  | 1351 | 1353 | 0.06 (16)     | -             | -             | -             | [57] |
| 190                            | 675 | 1.056 | Methyl 3,4-dimethylbenzoate                  | C <sub>10</sub> H <sub>12</sub> O <sub>2</sub> | 38404-42-1 | 1351 | 1353 | 0.37 (14)     | 0.24 (19)     | 0.16 (8)      | 0.19 (6)      | [8]  |
| 191                            | 680 | 0.952 | 2-Phenylethyl propionate                     | C <sub>11</sub> H <sub>14</sub> O <sub>2</sub> | 122-70-3   | 1357 | 1350 | 0.05 (41)     | -             | -             | -             | [8]  |
| 192                            | 745 | 0.936 | 2-Phenylethyl butanonate                     | C <sub>12</sub> H <sub>16</sub> O <sub>2</sub> | 103-52-6   | 1441 | 1439 | 0.06 (7)      | -             | -             | -             | [8]  |
| <b>Subtotal (GC Peak Area)</b> |     |       |                                              |                                                |            |      |      | <b>172.09</b> | <b>157.38</b> | <b>134.98</b> | <b>199.75</b> |      |
| <b>Subtotal (%)</b>            |     |       |                                              |                                                |            |      |      | <b>16.41</b>  | <b>21.59</b>  | <b>19.39</b>  | <b>26.14</b>  |      |
| <b>Ethers</b>                  |     |       |                                              |                                                |            |      |      |               |               |               |               |      |
| 193                            | 100 | 0.376 | 2-Ethoxy-2-methylpropane                     | C <sub>6</sub> H <sub>14</sub> O               | 637-92-3   | 621  | 620  | 2.06 (5)      | 2.17 (12)     | 3.17 (32)     | 2.89 (44)     | [58] |
| 194                            | 120 | 0.392 | 2-Methoxy-2-methylbutane                     | C <sub>6</sub> H <sub>14</sub> O               | 994-05-8   | 661  | 642  | 0.21 (9)      | 0.38 (11)     | 0.34 (38)     | 0.32 (50)     | [12] |
| 195                            | 135 | 0.392 | 2-Methyl-2-(1-methylethoxy)propane           | C <sub>7</sub> H <sub>16</sub> O               | 17348-59-3 | 691  | -    | 0.24 (57)     | 0.31 (44)     | 0.28 (35)     | 0.26 (49)     |      |
| 196                            | 305 | 0.480 | 1-Butoxypent-2-ene                           | C <sub>9</sub> H <sub>18</sub> O               | -          | 932  | -    | 0.17 (9)      | -             | -             | -             |      |
| 197                            | 345 | 0.464 | 1-(1-Ethoxyethoxy)pentane                    | C <sub>9</sub> H <sub>20</sub> O <sub>2</sub>  | 13442-89-2 | 974  | 977  | 0.25 (46)     | 0.23 (38)     | 0.15 (21)     | 0.19 (24)     | [1]  |
| 198                            | 470 | 0.536 | 2,5-Dimethoxy-2,5-dimethylhexane             | C <sub>10</sub> H <sub>22</sub> O <sub>2</sub> | 53273-13-5 | 1107 | -    | 0.06 (19)     | 0.07 (65)     | -             | 0.03 (10)     |      |
| <b>Subtotal (GC Peak Area)</b> |     |       |                                              |                                                |            |      |      | <b>2.99</b>   | <b>3.15</b>   | <b>3.94</b>   | <b>3.70</b>   |      |
| <b>Subtotal (%)</b>            |     |       |                                              |                                                |            |      |      | <b>0.28</b>   | <b>0.43</b>   | <b>0.57</b>   | <b>0.48</b>   |      |
| <b>Furan-type compounds</b>    |     |       |                                              |                                                |            |      |      |               |               |               |               |      |
| 199                            | 165 | 0.408 | Tetrahydro-2,2,5,5-tetramethylfuran          | C <sub>8</sub> H <sub>16</sub> O               | 15045-43-9 | 751  | -    | 3.16 (39)     | 3.39 (19)     | 3.64 (11)     | 3.58 (33)     |      |
| 200                            | 170 | 0.752 | 2-Vinylfuran                                 | C <sub>6</sub> H <sub>6</sub> O                | 1487-18-9  | 762  | 761  | 0.05 (11)     | -             | -             | -             | [24] |
| 201                            | 200 | 0.920 | Dihydro-2-methyl-3-furanone                  | C <sub>5</sub> H <sub>8</sub> O <sub>2</sub>   | 3188-00-9  | 813  | 804  | 0.15 (48)     | -             | -             | -             | [10] |
| 202                            | 290 | 1.472 | 1-(2-Furanyl)-ethanone                       | C <sub>6</sub> H <sub>6</sub> O <sub>2</sub>   | 1192-62-7  | 917  | 917  | 0.17 (50)     | -             | -             | -             | [59] |
| 203                            | 370 | 0.712 | (5-Methyl-2-furyl)methanethiol               | C <sub>6</sub> H <sub>8</sub> OS               | 59303-05-8 | 1001 | 995  | 0.97 (37)     | -             | -             | -             | [60] |
| 204                            | 465 | 0.464 | 2,2,4,4-Tetramethyltetrahydrofuran           | C <sub>8</sub> H <sub>16</sub> O               | 3358-28-9  | 1101 | -    | 0.22 (52)     | 0.20 (40)     | 0.21 (22)     | 0.15 (20)     |      |
| 205                            | 575 | 1.256 | 3-Phenylfuran                                | C <sub>10</sub> H <sub>8</sub> O               | 13679-41-9 | 1231 | 1228 | 0.26 (8)      | 0.14 (16)     | 0.07 (34)     | 0.06 (39)     | [29] |
| 206                            | 580 | 0.632 | 2,2,3,3,4,4-Hexamethyltetrahydrofuran        | C <sub>10</sub> H <sub>20</sub> O              | -          | 1236 | -    | 0.82 (4)      | -             | -             | -             |      |
| 207                            | 600 | 1.360 | 5-Butyldihydrofuran-2-one                    | C <sub>8</sub> H <sub>14</sub> O <sub>2</sub>  | 104-50-7   | 1260 | 1260 | 0.08 (27)     | -             | -             | -             | [10] |
| <b>Subtotal (GC Peak Area)</b> |     |       |                                              |                                                |            |      |      | <b>7.08</b>   | <b>3.72</b>   | <b>4.57</b>   | <b>4.56</b>   |      |
| <b>Subtotal (%)</b>            |     |       |                                              |                                                |            |      |      | <b>0.68</b>   | <b>0.51</b>   | <b>0.66</b>   | <b>0.60</b>   |      |
| <b>Hydrocarbons</b>            |     |       |                                              |                                                |            |      |      |               |               |               |               |      |
| <i>Aliphatics</i>              |     |       |                                              |                                                |            |      |      |               |               |               |               |      |
| 209                            | 170 | 0.384 | 2,3-Dimethylhexane                           | C <sub>8</sub> H <sub>18</sub>                 | 584-94-1   | 761  | 758  | -             | 0.37 (10)     | -             | -             | [27] |
| 210                            | 225 | 0.408 | 2,4-Dimethyl-1-heptene                       | C <sub>9</sub> H <sub>18</sub>                 | 19549-87-2 | 842  | 836  | 1.14 (98)     | 1.16 (11)     | 0.35 (15)     | 0.44 (20)     | [20] |
| 211                            | 245 | 0.384 | 4-Methyloctane                               | C <sub>9</sub> H <sub>20</sub>                 | 2216-34-4  | 865  | 864  | -             | 0.65 (68)     | -             | -             | [61] |
| 212                            | 280 | 0.400 | Nonane                                       | C <sub>9</sub> H <sub>20</sub>                 | 111-84-2   | 906  | 900  | -             | 0.06 (19)     | 0.19 (8)      | 0.15 (18)     | [20] |
| 213                            | 335 | 0.408 | 2-Methylnonane                               | C <sub>10</sub> H <sub>22</sub>                | 871-83-0   | 964  | 969  | -             | 0.29 (15)     | 0.21 (8)      | 0.14 (12)     | [20] |
| 214                            | 370 | 0.400 | Decane                                       | C <sub>10</sub> H <sub>22</sub>                | 124-18-5   | 1000 | 1000 | -             | 0.16 (20)     | 0.27 (36)     | 0.22 (9)      | [62] |
| 215                            | 405 | 0.432 | 3-Undecene                                   | C <sub>11</sub> H <sub>22</sub>                | 821-97-6   | 1037 | -    | 0.16 (15)     | -             | 0.14 (6)      | 0.16 (15)     |      |
| 216                            | 445 | 0.424 | 7-Methyl-2-decene                            | C <sub>11</sub> H <sub>22</sub>                | 74630-23-2 | 1079 | -    | 0.37 (35)     | 0.88 (1)      | 0.31 (51)     | 0.23 (15)     |      |
| 217                            | 455 | 0.480 | C <sub>11</sub> Hydrocarbon (m/z 41,67, 109) | C <sub>11</sub> H <sub>22</sub>                | -          | 1090 | -    | -             | -             | 0.14 (35)     | 0.21 (16)     |      |
| 218                            | 465 | 0.424 | Undecane                                     | C <sub>11</sub> H <sub>24</sub>                | 1120-21-4  | 1101 | 1101 | -             | -             | 0.90 (13)     | -             | [17] |
| 219                            | 520 | 0.424 | 2-Methylundecane                             | C <sub>12</sub> H <sub>26</sub>                | 7045-71-8  | 1165 | 1165 | 0.10 (7)      | -             | 0.15 (18)     | 0.11 (10)     | [27] |
| 220                            | 555 | 0.432 | Dodecane                                     | C <sub>12</sub> H <sub>26</sub>                | 112-40-3   | 1206 | 1201 | 0.80 (25)     | 0.80 (44)     | 0.97 (13)     | 0.71 (4)      | [17] |

|                                |     |       |                                             |                                                |            |      |      |              |              |              |              |      |
|--------------------------------|-----|-------|---------------------------------------------|------------------------------------------------|------------|------|------|--------------|--------------|--------------|--------------|------|
| 221                            | 620 | 0.424 | Tridecane                                   | C <sub>13</sub> H <sub>28</sub>                | 629-50-5   | 1301 | 1301 | 0.43 (8)     | 0.32 (3)     | 0.39 (15)    | 0.35 (11)    | [15] |
| 222                            | 790 | 0.480 | Pentadecane                                 | C <sub>15</sub> H <sub>32</sub>                | 629-62-9   | 1501 | 1500 | 0.39 (18)    | 0.43 (10)    | 0.40 (36)    | 0.37 (11)    | [62] |
| 223                            | 860 | 0.512 | Hexadecane                                  | C <sub>16</sub> H <sub>34</sub>                | 544-76-3   | 1601 | 1600 | -            | 0.41 (5)     | -            | 0.42 (5)     | [62] |
| <b>Aromatics</b>               |     |       |                                             |                                                |            |      |      |              |              |              |              |      |
| 224                            | 250 | 0.576 | 1,3-Dimethylbenzene                         | C <sub>8</sub> H <sub>10</sub>                 | 108-38-3   | 871  | 874  | 1.21 (8)     | -            | 1.25 (9)     | 1.15 (16)    | [3]  |
| 225                            | 270 | 0.616 | 1,2-Dimethylbenzene                         | C <sub>8</sub> H <sub>10</sub>                 | 95-47-6    | 895  | 908  | 1.42 (6)     | 1.55 (17)    | 1.37 (12)    | 1.23 (12)    | [63] |
| 226                            | 270 | 0.728 | Ethenylbenzene                              | C <sub>8</sub> H <sub>8</sub>                  | 100-42-5   | 895  | 891  | 1.72 (20)    | 1.41 (31)    | -            | -            | [10] |
| 227                            | 390 | 0.656 | 1,2,3-Trimethylbenzene                      | C <sub>9</sub> H <sub>12</sub>                 | 526-73-8   | 1021 | 1022 | 1.06 (9)     | 1.17 (23)    | 1.21 (15)    | 1.05 (11)    | [64] |
| 228                            | 450 | 0.616 | 1-Ethyl-2,3-dimethylbenzene                 | C <sub>10</sub> H <sub>14</sub>                | 933-98-2   | 1085 | 1094 | -            | 0.04 (32)    | -            | -            | [27] |
| 229                            | 455 | 0.704 | 1-Methyl-4-(1-methylethenyl)-benzene        | C <sub>10</sub> H <sub>12</sub>                | 1195-32-0  | 1090 | 1090 | -            | -            | 0.08 (13)    | -            | [65] |
| 230                            | 540 | 1.104 | Naphthalene                                 | C <sub>10</sub> H <sub>8</sub>                 | 91-20-3    | 1190 | 1179 | 0.52 (16)    | 0.52 (17)    | 0.55 [8]     | 0.86 (58)    | [8]  |
| 231                            | 600 | 0.520 | 1,3-bis(1,1-Dimethylethyl)benzene           | C <sub>14</sub> H <sub>22</sub>                | 1014-60-4  | 1259 | -    | 5.00 (10)    | 5.41 (9)     | 4.90 (10)    | 4.06 (10)    |      |
| 232                            | 700 | 1.136 | Biphenyl                                    | C <sub>12</sub> H <sub>10</sub>                | 92-52-4    | 1383 | 1385 | 0.26 (12)    | 0.21 (19)    | 0.15 (14)    | 0.15 (18)    | [16] |
| <b>Cyclics</b>                 |     |       |                                             |                                                |            |      |      |              |              |              |              |      |
| 233                            | 495 | 0.904 | 1,2-Dimethyl-1-pentyl-cyclopropane          | C <sub>10</sub> H <sub>20</sub>                | 62238-04-4 | 1136 | -    | -            | -            | 6.18 (5)     | -            |      |
| 234                            | 500 | 0.864 | 1-Methylpentyl cyclopropane                 | C <sub>8</sub> H <sub>18</sub>                 | 6976-28-9  | 1142 | -    | 20.63 (26)   | 20.57 (3)    | -            | -            |      |
| 235                            | 640 | 0.448 | 1-Butyl-2-propyl-cyclopentane               | C <sub>12</sub> H <sub>24</sub>                | 62199-50-2 | 1307 | -    | -            | -            | -            | 0.08 (14)    |      |
| <b>Subtotal (GC Peak Area)</b> |     |       |                                             |                                                |            |      |      | <b>35.22</b> | <b>36.42</b> | <b>20.10</b> | <b>12.08</b> |      |
| <b>Subtotal (%)</b>            |     |       |                                             |                                                |            |      |      | <b>3.36</b>  | <b>5.00</b>  | <b>2.89</b>  | <b>1.58</b>  |      |
| <b>Pyrans</b>                  |     |       |                                             |                                                |            |      |      |              |              |              |              |      |
| 236                            | 275 | 0.488 | 2,2,4,6-Tetramethyl-2H-pyran                | C <sub>9</sub> H <sub>14</sub> O               | -          | 901  | -    | -            | 0.21 (11)    | -            | -            |      |
| 237                            | 295 | 0.512 | 2,2,6-Trimethyl-4-methylene-2H-pyran        | C <sub>9</sub> H <sub>14</sub> O               | -          | 922  | -    | 0.14 (17)    | 0.15 (3)     | -            | -            |      |
| 238                            | 340 | 0.864 | 2,5-Dimethyl-2-hydroxymethyltetrahydropyran | C <sub>8</sub> H <sub>16</sub> O <sub>2</sub>  | -          | 969  | -    | 1.13 (13)    | 1.21 (5)     | 1.01 (15)    | 1.09 (5)     |      |
| <b>Subtotal (GC Peak Area)</b> |     |       |                                             |                                                |            |      |      | <b>1.27</b>  | <b>1.56</b>  | <b>1.01</b>  | <b>1.09</b>  |      |
| <b>Subtotal (%)</b>            |     |       |                                             |                                                |            |      |      | <b>0.12</b>  | <b>0.21</b>  | <b>0.14</b>  | <b>0.14</b>  |      |
| <b>Pyrazines</b>               |     |       |                                             |                                                |            |      |      |              |              |              |              |      |
| 239                            | 295 | 0.824 | Ethylpyrazine                               | C <sub>6</sub> H <sub>8</sub> N <sub>2</sub>   | 13925-00-3 | 922  | 920  | 0.10 (32)    | -            | -            | -            | [8]  |
| 240                            | 295 | 0.856 | 2,3-Dimethylpyrazine                        | C <sub>6</sub> H <sub>8</sub> N <sub>2</sub>   | 5910-89-4  | 922  | 920  | 0.08 (28)    | -            | -            | -            | [25] |
| 241                            | 370 | 0.776 | 2-Ethyl-5-methylpyrazine                    | C <sub>7</sub> H <sub>10</sub> N <sub>2</sub>  | 13360-64-0 | 1001 | 1000 | 1.05 (29)    | 0.13 (64)    | -            | 0.11 (46)    | [8]  |
| 242                            | 375 | 0.784 | Trimethylpyrazine                           | C <sub>7</sub> H <sub>10</sub> N <sub>2</sub>  | 14667-55-1 | 1006 | 999  | 0.66 (17)    | 0.10 (38)    | 0.16 (16)    | 0.16 (31)    | [29] |
| 243                            | 390 | 0.952 | 2-Ethenyl-5-methylpyrazine                  | C <sub>7</sub> H <sub>8</sub> N <sub>2</sub>   | 13925-08-1 | 1022 | 1022 | 0.49 (9)     | -            | -            | -            | [8]  |
| 244                            | 420 | 0.704 | 2-Methyl-3-isopropylpyrazine                | C <sub>8</sub> H <sub>12</sub> N <sub>2</sub>  | 15986-81-9 | 1053 | 1056 | 0.35 (20)    | 0.09 (27)    | -            | 0.08 (36)    | [66] |
| 245                            | 445 | 0.712 | 3-Ethyl-2,5-dimethylpyrazine                | C <sub>8</sub> H <sub>12</sub> N <sub>2</sub>  | 13360-65-1 | 1080 | 1079 | 1.33 (36)    | -            | -            | -            | [67] |
| 246                            | 515 | 0.672 | 3,5-Diethyl-2-methylpyrazine                | C <sub>9</sub> H <sub>14</sub> N <sub>2</sub>  | 18138-05-1 | 1160 | 1160 | 0.25 (5)     | -            | -            | -            | [68] |
|                                |     |       | 2,5-dimethyl-3-(2-methylpropyl)pyrazine     | C <sub>10</sub> H <sub>16</sub> N <sub>2</sub> | 32736-94-0 | 1207 | 1207 | 0.08 (30)    | -            | -            | -            | [69] |
| 247                            | 555 | 0.648 |                                             | C <sub>10</sub> H <sub>16</sub> N <sub>2</sub> | 32736-94-0 | 1207 | 1207 | 0.08 (30)    | -            | -            | -            | [70] |
| 248                            | 600 | 0.688 | 2-Butyl-3,5-dimethylpyrazine                | C <sub>10</sub> H <sub>16</sub> N <sub>2</sub> | 50888-63-6 | 1260 | 1254 | 0.14 (16)    | -            | -            | -            | [71] |
| <b>Subtotal (GC Peak Area)</b> |     |       |                                             |                                                |            |      |      | <b>4.51</b>  | <b>0.32</b>  | <b>0.16</b>  | <b>0.36</b>  |      |
| <b>Subtotal (%)</b>            |     |       |                                             |                                                |            |      |      | <b>0.43</b>  | <b>0.04</b>  | <b>0.02</b>  | <b>0.05</b>  |      |
| <b>S-compounds</b>             |     |       |                                             |                                                |            |      |      |              |              |              |              |      |
| 249                            | 155 | 0.600 | Methylsulfide                               | C <sub>2</sub> H <sub>6</sub> S <sub>2</sub>   | 624-92-0   | 731  | 738  | 0.17 (28)    | 0.09 (25)    | -            | 0.07 (11)    | [72] |
| 250                            | 285 | 0.952 | 1,3-Oxathiane                               | C <sub>4</sub> H <sub>8</sub> OS               | -          | 912  | -    | 2.59 (18)    | 1.27 (14)    | 0.74 (16)    | 0.80 (14)    |      |
| 251                            | 360 | 1.168 | Dihydro-2-methylthiophen-3(2H)-one          | C <sub>3</sub> H <sub>8</sub> OS               | 13679-85-1 | 991  | 994  | 0.87 (80)    | 1.19 (25)    | 0.46 (20)    | 0.53 (13)    | [25] |
| 252                            | 360 | 2.200 | 3-(Methylthio)propanol                      | C <sub>4</sub> H <sub>10</sub> OS              | 505-10-2   | 987  | 978  | 5.30 (5)     | 2.37 (56)    | -            | -            | [2]  |



|                                       |     |       |                                    |                                                 |            |      |      |                |               |               |               |      |
|---------------------------------------|-----|-------|------------------------------------|-------------------------------------------------|------------|------|------|----------------|---------------|---------------|---------------|------|
| 253                                   | 385 | 1.536 | 2-Acetylthiazole                   | C <sub>5</sub> H <sub>5</sub> NOS               | 24295-03-2 | 1017 | 1014 | 0.27 (6)       | -             | -             | -             | [8]  |
| 254                                   | 485 | 0.968 | 3-(Methylthio)propyl acetate       | C <sub>6</sub> H <sub>12</sub> O <sub>2</sub> S | 16630-55-0 | 1125 | 1123 | 0.13 (26)      | -             | -             | -             | [40] |
| 255                                   | 485 | 1.640 | 3-Methyl-2-thiophenecarboxaldehyde | C <sub>6</sub> H <sub>6</sub> OS                | 5834-16-2  | 1126 | 1133 | 0.08 (11)      | -             | -             | -             | [25] |
| 256                                   | 545 | 1.256 | Benzothiofuran                     | C <sub>8</sub> H <sub>6</sub> S                 | 95-15-8    | 1196 | 1172 | 0.09 (18)      | -             | -             | -             | [73] |
| 257                                   | 575 | 1.648 | Benzothiazole                      | C <sub>7</sub> H <sub>5</sub> NS                | 95-16-9    | 1231 | 1223 | 0.14 (14)      | 0.10 (34)     | -             | -             | [20] |
| <b>Subtotal (GC Peak Area)</b>        |     |       |                                    |                                                 |            |      |      | <b>9.65</b>    | <b>5.02</b>   | <b>1.20</b>   | <b>1.39</b>   |      |
| <b>Subtotal (%)</b>                   |     |       |                                    |                                                 |            |      |      | <b>0.92</b>    | <b>0.69</b>   | <b>0.17</b>   | <b>0.18</b>   |      |
| <b>Total</b>                          |     |       |                                    |                                                 |            |      |      | <b>1048.64</b> | <b>728.89</b> | <b>696.06</b> | <b>764.00</b> |      |
| <b>Number of identified compounds</b> |     |       |                                    |                                                 |            |      |      | <b>210</b>     | <b>170</b>    | <b>156</b>    | <b>172</b>    |      |

<sup>a</sup> Retention times for first (<sup>1</sup>t<sub>R</sub>) and second (<sup>2</sup>t<sub>R</sub>) dimensions in seconds.

<sup>b</sup> Mean of three independent assays (n=3).

<sup>c</sup> Retention Index obtained through the modulated chromatogram.

<sup>d</sup> RI, Retention Index reported in the literature for Equity-5 column or equivalents:

- Perestrelo R, Barros AS, Câmara JS, Rocha SM. In-depth search focused on furans, lactones, volatile phenols, and acetals as potential age markers of Madeira wines by comprehensive two-dimensional gas chromatography with time-of-flight mass spectrometry combined with solid phase microextraction. *J Agric Food Chem*. 2011;59: 3186–3204.
- Rychlik M, Schieberle P, Grosch W. Compilation of odour thresholds, odour qualities and retention indices of key food odorants. Deutsche Forschungsanstalt für Lebensmittelchemie and Institut für Lebensmittelchemie der Technischen Universität München; 1998.
- Engel E, Ratel J. Correction of the data generated by mass spectrometry analyses of biological tissues: Application to food authentication. *J Chromatogr A*. 2007;1154: 331–341.
- Kotseridis Y, Baumes R. Identification of impact odorants in Bordeaux red grape juice, in the commercial yeast used for its fermentation, and in the produced wine. *J Agric Food Chem*. 2000;48: 400–406.
- Schnermann P, Schieberle P. Evaluation of Key Odorants in Milk Chocolate and Cocoa Mass by Aroma Extract Dilution Analyses. *J Agric Food Chem*. 1997;45: 867–872.
- Figuéredo G, Cabassu P, Chalchat JC, Pasquier B. Studies of Mediterranean oregano populations. VIII - Chemical composition of essential oils of oreganos of various origins. *Flavour Fragr J*. 2006;21: 134–139.
- Wu S, Zorn H, Krings U, Berger RG. Volatiles from submerged and surface-cultured beefsteak fungus, *Fistulina hepatica*. *Flavour Fragr J*. 2007;22: 206–213.
- Adams R. Identification of essential oil components by gas chromatography/mass spectrometry. Carol Stream, IL: Allured Publishing Corporation; 1995.
- Tret'yakov. Retention Data. NIST Mass Spectrometry Data Center [Internet]. 2007.
- Pino JA, Mesa J, Muñoz Y, Pilar Martí M, Marbot R. Volatile components from Mango (*Mangifera indica* L.) cultivars. *J Agric Food Chem*. 2005;53: 2213–2223.
- Rembold H, Wallner P, Nitz S, Kollmannsberger H, Drawert F. Volatile components of chickpea (*Cicer arietinum* L.) seed. *J Agric Food Chem*. American Chemical Society; 1989;37: 659–662.
- Rocha SM, Freitas R, Cardoso P, Santos M, Martins R, Figueira E. Exploring the potentialities of comprehensive two-dimensional gas chromatography coupled to time of flight mass spectrometry to distinguish bivalve species: Comparison of two clam species (*Venerupis decussata* and *Venerupis philippinarum*). *J Chromatogr A*. Elsevier B.V.; 2013;1315: 152–61.
- Isidorov V, Purzyńska A, Modzelewska A, Serowiecka M. Distribution coefficients of aliphatic alcohols, carbonyl compounds and esters between air and Carboxen/polydimethylsiloxane fiber coating. *Anal Chim Acta*. 2006;560: 103–109.
- Guichard E, Michel S. Comparison of the relative quantities of aroma compounds found in fresh apricot (*Prunus armeniaca*) from six different varieties. *Z Leb Unters Forsch*. 1988;186: 301–307.
- Salvador AC, Baptista I, Barros AS, Gomes NCM, Cunha A, Almeida A, et al. Can volatile organic metabolites be used to simultaneously assess microbial and mite contamination level in cereal grains and coffee beans? *PLoS One*. 2013;8: e59338.
- Leffingwell JC, Alfrod ED. Volatile constituents of Perique tobacco. *J Environ Agric Food Chem*. 2005;4: 1–16.
- Silva I, Rocha SM, Coimbra M a, Marriotti PJ. Headspace solid-phase microextraction combined with comprehensive two-dimensional gas chromatography time-of-flight mass spectrometry for the determination of volatile compounds from marine salt. *J Chromatogr A*. Elsevier B.V.; 2010;1217: 5511–21.
- König WA, Joulain D, Hochmuth DH. GC/MS Library: Terpenoids and Related Constituents of Essential Oils [Internet]. 2006. Available: <http://www.massfinder.com/mfaterpenoids.htm>
- Tognolini M, Barocelli E, Ballabeni V, Bruni R, Bianchi A, Chiavarini M, et al. Comparative screening of plant essential oils: Phenylpropanoid moiety as basic core for antiplatelet activity. *Life Sci*. 2006;78: 1419–1432.
- Caldeira M, Barros A, S, Bilelo MJ, Parada A, Câmara JS, Rocha SM. Profiling allergic asthma volatile metabolic patterns using a headspace-solid phase microextraction/gas chromatography based methodology. *J Chromatogr A*. Elsevier B.V.; 2011;1218: 3771–3780.
- De Souza PP, Cardeal ZDL, Augusti R, Morrison P, Marriotti PJ. Determination of volatile compounds in Brazilian distilled cachaça by using comprehensive two-dimensional gas chromatography and effects of production pathways. *J Chromatogr A*. 2009;1216: 2881–2890.
- Kallio M, Jussila M, Rissanen T, Anttila P, Hartonen K, Reissell A, et al. Comprehensive two-dimensional gas chromatography coupled to time-of-flight mass spectrometry in the identification of organic compounds in atmospheric aerosols from coniferous forest. *J Chromatogr A*. 2006;1125: 234–243.
- Zehentbauer G, Reineccius GA. Determination of key aroma components of Cheddar cheese using dynamic headspace dilution assay. *Flavour Fragr J*. 2002;17: 300–305.
- Beal AD, Mottram DS. Compounds contributing to the characteristic aroma of malted barley. *J Agric Food Chem*. American Chemical Society; 1994;42: 2880–2884.
- Methven L, Tsoukka M, Oruna-Concha MJ, Parker JK, Mottram DS. Influence of sulfur amino acids on the volatile and nonvolatile components of cooked salmon (*Salmo salar*). *J Agric Food Chem*. 2007;55: 1427–1436.
- Borse BB, Rao LJM, Ramalakshmi K, Raghavan B. Chemical composition of volatiles from coconut sap (neera) and effect of processing. *Food Chem*. 2006;101: 877–880.
- Xu X, van Stee LLP, Williams J, Beens J, Adachour M, Vreuls RJJ, et al. Comprehensive two-dimensional gas chromatography (GCxGC) measurements of volatile organic compounds in the atmosphere. *Atmos Chem Phys Discuss*. 2003;3: 1139–1181.
- Tellez MR, Canel C, Rimando AM, Duke SO. Differential accumulation of isoprenoids in glanded and glandless *Artemisia annua* L. *Phytochemistry*. 1999;52: 1035–1040.

29. Solina M, Baumgartner P, Johnson RL, Whitfield FB. Volatile aroma components of soy protein isolate and acid-hydrolysed vegetable protein. *Food Chem.* 2005;90: 861–873.
30. Ceccarini L, Macchia M, Flamini G, Cioni PL, Caponi C, Morelli I. Essential oil composition of *Helianthus annuus* L. leaves and heads of two cultivated hybrids “Carlos” and “Florom 350.” *Ind Crops Prod.* 2004;19: 13–17.
31. Ferhat MA, Tigrine-Kordjani N, Chemat S, Meklati BY, Chemat F. Rapid Extraction of Volatile Compounds Using a New Simultaneous Microwave Distillation: Solvent Extraction Device. *Chromatographia.* 2007;65: 217–222.
32. Pino JA, Marbot R, Fuentes V. Characterization of volatiles in bullock’s heart (*Annona reticulata* L.) fruit cultivars from Cuba. *J Agric Food Chem.* 2003;51: 3836–3839.
33. Mevy JP, Bessiere JM, Pelissier Y, Masotti V, Ruzzier M, Rabier J, et al. Composition of the volatile constituents of the aerial parts of an endemic plant of Ivory Coast, *Monanthes caepea* (E.G. & A. Campus) verdc. *Flavour Fragr J.* 2004;19: 526–528.
34. Shang C, Yaoming H, Deng C, Hu K. Rapid determination of volatile constituents of *Michelia alba* flowers by gas chromatography-mass spectrometry with solid-phase microextraction. *J Chromatogr A.* 2002;942: 283–288.
35. Petronilho S, Rocha SM, Ramírez-chávez E, Molina-torres J, Rios-chavez P. Assessment of the terpenic profile of *Callistemon citrinus* (Curtis) Skeels from Mexico. *Ind Crop Prod. Elsevier B.V.*; 2013;46: 369–379.
36. Rocha SM, Coutinho P, Delgadillo I, Coimbra MA. Headspace-solid phase microextraction-gas chromatography as a tool to define an index that establishes the retention capacity of the wine polymeric fraction towards ethyl esters. *J Chromatogr A.* 2007;1150: 155–161.
37. Rocha SM, Coelho E, Zrostlíková J, Delgadillo I, Coimbra MA. Comprehensive two-dimensional gas chromatography with time-of-flight mass spectrometry of monoterpenoids as a powerful tool for grape origin traceability. *J Chromatogr A.* 2007;1161: 292–9.
38. Jalali HT, Petronilho S, Villaverde JJ, Coimbra MA, Domingues MRM, Ebrahimián ZJ, et al. Deeper insight into the monoterpene composition of *Ferula gummosa* oleo-gum-resin from Iran. *Ind Crops Prod. Elsevier B.V.*; 2012;36: 500–507.
39. Doimo L. Iso-Citral and Iso-Geraniol in Lemon-Myrtle (*Backhousia citriodora* F. Muell.) Essential Oils. *J Essent Oil Res.* 2001;13: 236–237.
40. Beaulieu JC, Grimm CC. Identification of volatile compounds in cantaloupe at various developmental stages using solid phase microextraction. *J Agric Food Chem.* 2001;49: 1345–1352.
41. Ozel MZ, Gogus F, Lewis AC. Comparison of direct thermal desorption with water distillation and superheated water extraction for the analysis of volatile components of *Rosa damascena* Mill. using GCxGC-TOF/MS. *Anal Chim Acta.* 2006;566: 172–177.
42. Petronilho S, Maraschin M, Delgadillo I, Coimbra MA, Rocha SM. Sesquiterpene composition of the inflorescences of Brazilian chamomile (*Matricaria recutita* L.): Impact of the agricultural practices. *Ind Crops Prod.* 2011;34: 1482–1490.
43. Jalali HT, Petronilho S, Villaverde JJ, Coimbra MA, Domingues MRM, Ebrahimián ZJ, et al. Assessment of the sesquiterpene profile of *Ferula gummosa* oleo-gum-resin (galbanum) from Iran. Contributes to its valuation as a potential source of sesquiterpene compounds. *Ind Crops Prod. Elsevier B.V.*; 2013;44: 185–191.
44. El-Sayed AM, Heppelthwaite VJ, Manning LM, Gibb AR, Suckling DM. Volatile constituents of fermented sugar baits and their attraction to lepidopteran species. *J Agric Food Chem.* 2005;53: 953–958.
45. Steinhilber P, Schieberle P. Characterization of the key aroma compounds in soy sauce using approaches of molecular sensory science. *J Agric Food Chem.* 2007;55: 6262–6269.
46. Isidorov VA, Krajewska U, Dubis EN, Jdanova MA. Partition coefficients of alkyl aromatic hydrocarbons and esters in a hexane-acetonitrile system. *J Chromatogr A.* 2001;923: 127–136.
47. Bicalho B, Pereira AS, Aquino Neto FR, Pinto AC, Rezende CM. Application of high-temperature gas chromatography-mass spectrometry to the investigation of glycosidically bound components related to cashew apple (*Anacardium occidentale* L. var. *nanum*) Volatiles. *J Agric Food Chem.* 2000;48: 1167–1174.
48. Valim MF, Rouseff RL, Lin J. Gas Chromatographic – Olfactometric Characterization of Aroma Compounds in Two Types of Cashew Apple Nectar Gas Chromatographic – Olfactometric Characterization of Aroma Compounds in Two Types of Cashew Apple Nectar. *J Agric Food Chem.* 2003;51: 1010–1015.
49. Yuping Z, Jiming LI, Yan XU, Hui D, Wenlai FAN, Guang Z. Extraction, preparation and identification of volatile compounds in Changyu XO Brandy. *Chinese J Chromatogr.* 2008;26: 212–222.
50. Sotomayor JA, Martínez R, García A., Jordán MJ. Thymus *zygis* Subsp. *Gracilis*: Watering Level Effect on Phytomass Production and Essential Oil Quality. *J Agric Food Chem.* 2004;52: 5418–5424.
51. Olson KL, Wong CA, Fleck LL, Lazar DF. Qualitative and Quantitative Determination of Solvent Formulations in Automotive Paints. *J Chromatogr Sci.* 1987;25: 418–423.
52. Vasta V, Ratel J, Engel E. Mass Spectrometry Analysis of Volatile Compounds in Raw Meat for the Authentication of the Feeding Background of Farm Animals. *J Agric Food Chem.* 2007;55: 4630–4639.
53. Choi H-S. Character impact odorants of Citrus Hallabong [(*C. unshiu* Marcov x *C. sinensis* Osbeck) x *C. reticulata* Blanco] cold-pressed peel oil. *J Agric Food Chem.* 2003;51: 2687–2692.
54. Demyttenaere JCR, Martínez JIS, Verhé R, Sandra P, De Kimpe N. Analysis of volatiles of malt whisky by solid-phase microextraction and stir bar sorptive extraction. *J Chromatogr A.* 2003;985: 221–232.
55. Marques F de A, McElfresh JS, Millar JG. Kováts Retention Indexes of Monounsaturated C12, C14, and C16 Alcohols, Acetates and Aldehydes Commonly Found in Lepidopteran Pheromone Blends. *J Braz Chem Soc.* 2000;11: 592–599.
56. Guichard H, Lemesle S, Ledauphin J, Barillier D, Picoche B. Chemical and sensorial aroma characterization of freshly distilled calvados. 1. Evaluation of quality and defects on the basis of key odorants by olfactometry and sensory analysis. *J Agric Food Chem.* 2003;51: 424–432.
57. Fan W, Qian MC. Characterization of aroma compounds of Chinese “Wuliangye” and “Jiannanchun” liquors by aroma extract dilution analysis. *J Agric Food Chem.* 2006;54: 2695–2704.
58. Verevkin SP, Krasnykh EL, Vasiltsova T V, Heintz A. Determination of Ambient Temperature Vapor Pressures and Vaporization Enthalpies of Branched Ethers. *J Chem Eng Data.* 2003;48: 591–599.
59. Santos MC, Nunes C, Rocha MAM, Rodrigues A, Rocha SM, Saraiva JA, et al. Impact of high pressure treatments on the physicochemical properties of a sulphur dioxide-free white wine during bottle storage: Evidence for Maillard reaction acceleration. *Innov Food Sci Emerg Technol. Elsevier Ltd;* 2013;20: 51–58.
60. Hofmann T, Schieberle P. Identification of key aroma compounds generated from cysteine and carbohydrates under roasting conditions. *Zeitschrift für Leb und -forsch A.* 1998;207: 229–236.
61. Zaikin VG, Borisov RS. Chromatographic – Mass Spectrometric Analysis of Fischer – Tropsch Synthesis Products. *J Anal Chem.* 2002;57: 544–551.
62. Rocha SM, Caldeira M, Carrola J, Santos M, Cruz N, Duarte IF. Exploring the human urine metabolomic potentialities by comprehensive two-dimensional gas chromatography coupled to time of flight mass spectrometry. *J Chromatogr A. Elsevier B.V.*; 2012;1252: 155–63.
63. Buchin S, Salmon J-C, Carnat A-P, Berger T, Bugaud C, Bosseset JO. Identification de composés monoterpéniques, sesquiterpéniques et benzéniques dans un lait d’alpage très riche en ces substances. *Mitt Leb Hyg.* 2002;93: 199–216.

64. Adams RP. Systematics of *Juniperus* section *Juniperus* based on leaf essential oils and random amplified polymorphic DNAs (RAPDs). *Biochem Syst Ecol.* 2000;28: 515–528.
65. Angioni A, Barra A, Coroneo V, Dessi S, Cabras P. Chemical composition, seasonal variability, and antifungal activity of *Lavandula stoechas* L. ssp. *stoechas* essential oils from stem/leaves and flowers. *J Agric Food Chem.* 54AD:12: 4364–4370.
66. Boylston TD, Viniyard BT. Isolation of volatile flavor compounds from peanut butter using purge-and-trap technique. In: Wetzel D, Charalambous G, editors. *Instrumental Methods in Food and Beverage Analysis*. 1998. pp. 225–243.
67. Gallois A, Grimont PAD. Pyrazines responsible for the potatolike odor produced by some *Serratia* and *Cedecea* strains. *Appl Environ Microbiol.* 1985;50: 1048–1051.
68. Murkovic M, Piironen V, Lampi AM, Kraushofer T, Sontag G. Changes in chemical composition of pumpkin seeds during the roasting process for production of pumpkin seed oil (Part 1: Non-volatile compounds). *Food Chem.* 2004;84: 359–365.
69. Oruna-Concha, M.J. Duckham SC, Ames JM. Comparison of volatile compounds isolated from the skin and flesh of four potato cultivars after baking. *J Agric Food Chem.* 2001;49: 2414–2421.
70. Qian M, Reineccius G. Potent aroma compounds in Parmigiano Reggiano cheese studied using a dynamic headspace (purge-trap) method. *Flavour Fragr J.* 2003;18: 252–259.
71. Fan W, Xu Y, Zhang Y. Characterization of pyrazines in some Chinese liquors and their approximate concentrations. *J Agric Food Chem.* 2007;55: 9956–9962.
72. Engel E, Baty C, Le Corre D, Souchon I, Martin N. Flavor-active compounds potentially implicated in cooked cauliflower acceptance. *J Agric Food Chem.* 2002;50: 6459–6467.
73. Andersson JT, Weis U. Gas chromatographic determination of polycyclic aromatic compounds with fluorinated analogues as internal standards. *J Chromatogr A.* 1994;659: 151–161.
